# Supplementary material for: Whole-transcriptome analysis of differentially expressed genes in the mutant and normal capitula of Chrysanthemum morifolium
Source: BMC Genom Data. 2021 Jan 25;22:2. doi: 10.1186/s12863-021-00959-2 (PMC7853313; doi:10.1186/s12863-021-00959-2)
Supplement: Supplementary file 11 — Additional file 11. Important photoperiod pathway genes in chrysanthemum [file 12863_2021_959_MOESM11_ESM.xlsx]

## Sheet: Sheet1
GeneID	The normal capitula fpkm	The mutant capitula fpkm	Protein symbol	Description	KEGG_A_class	KEGG_B_class	Pathway	K_ID	GO Component	GO Function	GO Process
Isoform0012271	1.06	0.906667	CRY1a	cryptochrome 1a [Chrysanthemum lavandulifolium]	Organismal Systems	Environmental adaptation	ko04712//Circadian rhythm - plant	K12118	-	GO:0016830//carbon-carbon lyase activity	GO:0006259//DNA metabolic process
Isoform0019779	0.306667	0.16	CRY1	cryptochrome I, partial [Phaseolus vulgaris]	Organismal Systems	Environmental adaptation	ko04712//Circadian rhythm - plant	K12118	-	-	-
Isoform0021649	1.75333	0.573333	CRY1	cryptochrome I, partial [Phaseolus vulgaris]	Organismal Systems	Environmental adaptation	ko04712//Circadian rhythm - plant	K12118	-	-	-
Isoform0022592	3.33	2.78667	CRY1	cryptochrome 1.2 [Chrysanthemum boreale]	Organismal Systems	Environmental adaptation	ko04712//Circadian rhythm - plant	K12118	-	GO:0016829//lyase activity	-
Isoform0026865	0.833333	0.48	CRY1	cryptochrome 1.2 [Chrysanthemum boreale]	Organismal Systems	Environmental adaptation	ko04712//Circadian rhythm - plant	K12118	-	-	-
Isoform0027554	14.5867	13.9667	CRY1b	cryptochrome 1b [Chrysanthemum lavandulifolium]	Organismal Systems	Environmental adaptation	ko04712//Circadian rhythm - plant	K12118	GO:0043231//intracellular membrane-bounded organelle	GO:0009881//photoreceptor activity;GO:0016301//kinase activity;GO:0016830//carbon-carbon lyase activity;GO:0032550//purine ribonucleoside binding;GO:0046983//protein dimerization activity	GO:0001558//regulation of cell growth;GO:0006259//DNA metabolic process;GO:0006468//protein phosphorylation;GO:0007623//circadian rhythm;GO:0009639//response to red or far red light;GO:0009812//flavonoid metabolic process;GO:0030522//intracellular receptor signaling pathway;GO:0043269//regulation of ion transport;GO:0044710//single-organism metabolic process;GO:0048509//regulation of meristem dev…
Isoform0027883	2.57667	2.67667	CRY1	blue-light photoreceptor [Artemisia annua]	Organismal Systems	Environmental adaptation	ko04712//Circadian rhythm - plant	K12118	GO:0043231//intracellular membrane-bounded organelle	GO:0009881//photoreceptor activity;GO:0016301//kinase activity;GO:0016830//carbon-carbon lyase activity;GO:0032550//purine ribonucleoside binding;GO:0046983//protein dimerization activity	GO:0001558//regulation of cell growth;GO:0006259//DNA metabolic process;GO:0006468//protein phosphorylation;GO:0007623//circadian rhythm;GO:0009639//response to red or far red light;GO:0009812//flavonoid metabolic process;GO:0030522//intracellular receptor signaling pathway;GO:0043269//regulation of ion transport;GO:0044710//single-organism metabolic process;GO:0048509//regulation of meristem dev…
Isoform0029131	3.68667	3.55667	CRY1a	cryptochrome 1a [Chrysanthemum lavandulifolium]	Organismal Systems	Environmental adaptation	ko04712//Circadian rhythm - plant	K12118	-	-	GO:0006259//DNA metabolic process
Isoform0031248	0.693333	0.72	CRY1	blue-light photoreceptor [Artemisia annua]	Organismal Systems	Environmental adaptation	ko04712//Circadian rhythm - plant	K12118	-	-	-
Isoform0031254	0.453333	0.31	CRY1a	cryptochrome 1a [Chrysanthemum lavandulifolium]	Organismal Systems	Environmental adaptation	ko04712//Circadian rhythm - plant	K12118	-	-	-
Isoform0031798	0.466667	0.323333	CRY1a	cryptochrome 1a [Chrysanthemum lavandulifolium]	Organismal Systems	Environmental adaptation	ko04712//Circadian rhythm - plant	K12118	-	-	GO:0006259//DNA metabolic process
Isoform0033370	2.81667	3.14667	CRY1	blue-light photoreceptor [Artemisia annua]	Organismal Systems	Environmental adaptation	ko04712//Circadian rhythm - plant	K12118	-	-	-
Isoform0034297	1.46667	1.43	CRY1	cryptochrome 1.2 [Chrysanthemum boreale]	Organismal Systems	Environmental adaptation	ko04712//Circadian rhythm - plant	K12118	-	-	-
Isoform0034451	0.4	0.27	CRY1a	cryptochrome 1a [Chrysanthemum lavandulifolium]	Organismal Systems	Environmental adaptation	ko04712//Circadian rhythm - plant	K12118	-	-	-
Isoform0034812	1.22	1.21667	CRY1a	cryptochrome 1a [Chrysanthemum lavandulifolium]	Organismal Systems	Environmental adaptation	ko04712//Circadian rhythm - plant	K12118	-	-	-
Isoform0034990	0.576667	0.413333	CRY1	cryptochrome 1.2 [Chrysanthemum boreale]	Organismal Systems	Environmental adaptation	ko04712//Circadian rhythm - plant	K12118	-	-	-
Isoform0035639	4.34333	4.76333	CRY2	cryptochrome 2 [Chrysanthemum lavandulifolium]	Organismal Systems	Environmental adaptation	ko04712//Circadian rhythm - plant	K12119	-	-	-
Isoform0040373	0.663333	0.603333	CRY1a	cryptochrome 1a [Chrysanthemum lavandulifolium]	Organismal Systems	Environmental adaptation	ko04712//Circadian rhythm - plant	K12118	-	-	GO:0006259//DNA metabolic process
Isoform0041267	0.543333	0.6	CRY1a	cryptochrome 1a [Chrysanthemum lavandulifolium]	Organismal Systems	Environmental adaptation	ko04712//Circadian rhythm - plant	K12118	-	-	-
Isoform0041315	5.33	5.24667	CRY2	cryptochrome 2 [Chrysanthemum lavandulifolium]	Organismal Systems	Environmental adaptation	ko04712//Circadian rhythm - plant	K12119	-	-	GO:0006259//DNA metabolic process
Isoform0044073	14.17	15.06	CRY2	cryptochrome 2 [Chrysanthemum lavandulifolium]	Organismal Systems	Environmental adaptation	ko04712//Circadian rhythm - plant	K12119	GO:0043231//intracellular membrane-bounded organelle	GO:0009881//photoreceptor activity;GO:0016830//carbon-carbon lyase activity;GO:0032550//purine ribonucleoside binding;GO:0046983//protein dimerization activity	GO:0006259//DNA metabolic process;GO:0006464//cellular protein modification process;GO:0006950//response to stress;GO:0007623//circadian rhythm;GO:0009416//response to light stimulus;GO:0009606//tropism;GO:0009909//regulation of flower development;GO:0016568//chromatin modification;GO:0030522//intracellular receptor signaling pathway;GO:0042743//hydrogen peroxide metabolic process;GO:0048509//reg…
Isoform0046318	0.65	0.52	CRY1a	cryptochrome 1a [Chrysanthemum lavandulifolium]	Organismal Systems	Environmental adaptation	ko04712//Circadian rhythm - plant	K12118	-	-	GO:0006259//DNA metabolic process
Isoform0046994	0.72	0.773333	CRY1a	cryptochrome 1a [Chrysanthemum lavandulifolium]	Organismal Systems	Environmental adaptation	ko04712//Circadian rhythm - plant	K12118	-	-	GO:0006259//DNA metabolic process
Isoform0053800	4.24667	4.00667	CRY1a	cryptochrome 1a [Chrysanthemum lavandulifolium]	Organismal Systems	Environmental adaptation	ko04712//Circadian rhythm - plant	K12118	-	-	GO:0006259//DNA metabolic process
Isoform0055789	0.756667	0.433333	CRY1a	cryptochrome 1a [Chrysanthemum lavandulifolium]	Organismal Systems	Environmental adaptation	ko04712//Circadian rhythm - plant	K12118	-	-	-
Isoform0057116	1.39	1.22	CRY1	blue-light photoreceptor [Artemisia annua]	Organismal Systems	Environmental adaptation	ko04712//Circadian rhythm - plant	K12118	-	-	-
Isoform0057793	5	4.35	CRY2	cryptochrome 2 [Chrysanthemum lavandulifolium]	Organismal Systems	Environmental adaptation	ko04712//Circadian rhythm - plant	K12119	-	-	GO:0006259//DNA metabolic process
Isoform0058624	4.74667	4.17	CRY2	cryptochrome 2 [Chrysanthemum lavandulifolium]	Organismal Systems	Environmental adaptation	ko04712//Circadian rhythm - plant	K12119	-	-	GO:0006259//DNA metabolic process
Isoform0058746	1.96	1.62333	CRY1	cryptochrome 1.2 [Chrysanthemum boreale]	Organismal Systems	Environmental adaptation	ko04712//Circadian rhythm - plant	K12118	-	-	GO:0006259//DNA metabolic process
Isoform0059398	1.60667	1.7	CRY1	cryptochrome 1.2 [Chrysanthemum boreale]	Organismal Systems	Environmental adaptation	ko04712//Circadian rhythm - plant	K12118	-	-	GO:0006259//DNA metabolic process
Isoform0062131	2.08	2.11333	CRY1	blue-light photoreceptor [Artemisia annua]	Organismal Systems	Environmental adaptation	ko04712//Circadian rhythm - plant	K12118	GO:0043231//intracellular membrane-bounded organelle	GO:0009881//photoreceptor activity;GO:0016301//kinase activity;GO:0016830//carbon-carbon lyase activity;GO:0032550//purine ribonucleoside binding;GO:0046983//protein dimerization activity	GO:0001558//regulation of cell growth;GO:0006259//DNA metabolic process;GO:0006468//protein phosphorylation;GO:0007623//circadian rhythm;GO:0009639//response to red or far red light;GO:0009812//flavonoid metabolic process;GO:0030522//intracellular receptor signaling pathway;GO:0043269//regulation of ion transport;GO:0044710//single-organism metabolic process;GO:0048509//regulation of meristem dev…
Isoform0064420	0.416667	0.25	CRY1a	cryptochrome 1a [Chrysanthemum lavandulifolium]	Organismal Systems	Environmental adaptation	ko04712//Circadian rhythm - plant	K12118	-	-	-
Isoform0064784	0.623333	0.59	CRY1b	cryptochrome 1b [Chrysanthemum lavandulifolium]	Organismal Systems	Environmental adaptation	ko04712//Circadian rhythm - plant	K12118	-	-	GO:0006259//DNA metabolic process
Isoform0066728	2.1	1.53667	CRY1	cryptochrome 1.2 [Chrysanthemum boreale]	Organismal Systems	Environmental adaptation	ko04712//Circadian rhythm - plant	K12118	GO:0043231//intracellular membrane-bounded organelle	GO:0009881//photoreceptor activity;GO:0016301//kinase activity;GO:0016830//carbon-carbon lyase activity;GO:0032550//purine ribonucleoside binding;GO:0046983//protein dimerization activity	GO:0001558//regulation of cell growth;GO:0006259//DNA metabolic process;GO:0006468//protein phosphorylation;GO:0007623//circadian rhythm;GO:0009639//response to red or far red light;GO:0009812//flavonoid metabolic process;GO:0030522//intracellular receptor signaling pathway;GO:0043269//regulation of ion transport;GO:0044710//single-organism metabolic process;GO:0048509//regulation of meristem dev…
Isoform0067374	0.56	0.583333	CRY1a	cryptochrome 1a [Chrysanthemum lavandulifolium]	Organismal Systems	Environmental adaptation	ko04712//Circadian rhythm - plant	K12118	-	-	-
Isoform0069767	1.42667	1.34	CRY1a	cryptochrome 1a [Chrysanthemum lavandulifolium]	Organismal Systems	Environmental adaptation	ko04712//Circadian rhythm - plant	K12118	GO:0043231//intracellular membrane-bounded organelle	GO:0009881//photoreceptor activity;GO:0016301//kinase activity;GO:0016830//carbon-carbon lyase activity;GO:0032550//purine ribonucleoside binding;GO:0046983//protein dimerization activity	GO:0001558//regulation of cell growth;GO:0006259//DNA metabolic process;GO:0006468//protein phosphorylation;GO:0007623//circadian rhythm;GO:0009639//response to red or far red light;GO:0009812//flavonoid metabolic process;GO:0030522//intracellular receptor signaling pathway;GO:0043269//regulation of ion transport;GO:0044710//single-organism metabolic process;GO:0048509//regulation of meristem dev…
Isoform0070340	1.61667	1.42333	CRY1	cryptochrome 1.2 [Chrysanthemum boreale]	Organismal Systems	Environmental adaptation	ko04712//Circadian rhythm - plant	K12118	-	-	GO:0006259//DNA metabolic process
Isoform0070460	3.29667	2.45667	CRY1a	cryptochrome 1a [Chrysanthemum lavandulifolium]	Organismal Systems	Environmental adaptation	ko04712//Circadian rhythm - plant	K12118	-	-	GO:0006259//DNA metabolic process
Isoform0071034	1.60667	1.70333	CRY1a	cryptochrome 1a [Chrysanthemum lavandulifolium]	Organismal Systems	Environmental adaptation	ko04712//Circadian rhythm - plant	K12118	-	-	GO:0006259//DNA metabolic process
Isoform0073055	0.33	0.18	CRY1	cryptochrome 2 [Glycine max]	Organismal Systems	Environmental adaptation	ko04712//Circadian rhythm - plant	K12119	-	-	-
Isoform0074595	1.14667	1.2	CRY1	cryptochrome 1.2 [Chrysanthemum boreale]	Organismal Systems	Environmental adaptation	ko04712//Circadian rhythm - plant	K12118	-	-	GO:0006259//DNA metabolic process
Isoform0075737	0.653333	0.616667	CRY1b	cryptochrome 1b [Chrysanthemum lavandulifolium]	Organismal Systems	Environmental adaptation	ko04712//Circadian rhythm - plant	K12118	-	-	-
Isoform0078303	0.416667	0.436667	CRY1a	cryptochrome 1a [Chrysanthemum lavandulifolium]	Organismal Systems	Environmental adaptation	ko04712//Circadian rhythm - plant	K12118	-	GO:0016829//lyase activity	-
Isoform0078777	0.433333	0.42	CRY1a	cryptochrome 1a [Chrysanthemum lavandulifolium]	Organismal Systems	Environmental adaptation	ko04712//Circadian rhythm - plant	K12118	-	-	-
Isoform0078912	0.183333	0.15	CRY1a	cryptochrome 1a [Chrysanthemum lavandulifolium]	Organismal Systems	Environmental adaptation	ko04712//Circadian rhythm - plant	K12118	-	-	-
Isoform0079161	2.14667	2.04333	CRY1	cryptochrome 1.2 [Chrysanthemum boreale]	Organismal Systems	Environmental adaptation	ko04712//Circadian rhythm - plant	K12118	-	-	GO:0006259//DNA metabolic process
Isoform0081156	0.36	0.286667	CRY1a	cryptochrome 1a [Chrysanthemum lavandulifolium]	Organismal Systems	Environmental adaptation	ko04712//Circadian rhythm - plant	K12118	-	GO:0016830//carbon-carbon lyase activity	GO:0006259//DNA metabolic process
Isoform0081296	1.68333	1.83667	CRY1	cryptochrome 1.2 [Chrysanthemum boreale]	Organismal Systems	Environmental adaptation	ko04712//Circadian rhythm - plant	K12118	-	-	GO:0006259//DNA metabolic process
Isoform0082541	0.393333	0.26	CRY1a	cryptochrome 1a [Chrysanthemum lavandulifolium]	Organismal Systems	Environmental adaptation	ko04712//Circadian rhythm - plant	K12118	-	-	-
Isoform0083919	0.54	0.48	CRY1a	cryptochrome 1a [Chrysanthemum lavandulifolium]	Organismal Systems	Environmental adaptation	ko04712//Circadian rhythm - plant	K12118	-	-	-
Isoform0084225	0.166667	0.116667	CRY1a	cryptochrome 1a [Chrysanthemum lavandulifolium]	Organismal Systems	Environmental adaptation	ko04712//Circadian rhythm - plant	K12118	-	-	-
Isoform0087016	1.39667	1.21667	CRY1a	cryptochrome 1a [Chrysanthemum lavandulifolium]	Organismal Systems	Environmental adaptation	ko04712//Circadian rhythm - plant	K12118	GO:0043231//intracellular membrane-bounded organelle	GO:0009881//photoreceptor activity;GO:0016301//kinase activity;GO:0016830//carbon-carbon lyase activity;GO:0032550//purine ribonucleoside binding;GO:0046983//protein dimerization activity	GO:0001558//regulation of cell growth;GO:0006259//DNA metabolic process;GO:0006468//protein phosphorylation;GO:0007623//circadian rhythm;GO:0009639//response to red or far red light;GO:0009812//flavonoid metabolic process;GO:0030522//intracellular receptor signaling pathway;GO:0043269//regulation of ion transport;GO:0044710//single-organism metabolic process;GO:0048509//regulation of meristem dev…
Isoform0087383	0.873333	0.503333	CRY1a	cryptochrome 1a [Chrysanthemum lavandulifolium]	Organismal Systems	Environmental adaptation	ko04712//Circadian rhythm - plant	K12118	-	-	-
Isoform0088960	0.33	0.273333	CRY1	cryptochrome 1.2 [Chrysanthemum boreale]	Organismal Systems	Environmental adaptation	ko04712//Circadian rhythm - plant	K12118	-	GO:0016829//lyase activity	-
Isoform0090599	0.59	0.643333	CRY1a	cryptochrome 1a [Chrysanthemum lavandulifolium]	Organismal Systems	Environmental adaptation	ko04712//Circadian rhythm - plant	K12118	-	-	GO:0006259//DNA metabolic process
Isoform0090821	2.67	2.8	CRY1	cryptochrome 1.2 [Chrysanthemum boreale]	Organismal Systems	Environmental adaptation	ko04712//Circadian rhythm - plant	K12118	-	-	GO:0006259//DNA metabolic process
Isoform0091589	1.55667	1.98	CRY1	cryptochrome 1.2 [Chrysanthemum boreale]	Organismal Systems	Environmental adaptation	ko04712//Circadian rhythm - plant	K12118	-	-	GO:0006259//DNA metabolic process
Isoform0091647	4.18	3.39	CRY1a	cryptochrome 1a [Chrysanthemum lavandulifolium]	Organismal Systems	Environmental adaptation	ko04712//Circadian rhythm - plant	K12118	-	-	GO:0006259//DNA metabolic process
Isoform0091734	2.55	2.26	CRY1	cryptochrome 1.2 [Chrysanthemum boreale]	Organismal Systems	Environmental adaptation	ko04712//Circadian rhythm - plant	K12118	-	-	GO:0006259//DNA metabolic process
Isoform0092176	0.626667	0.496667	CRY1	cryptochrome 1.2 [Chrysanthemum boreale]	Organismal Systems	Environmental adaptation	ko04712//Circadian rhythm - plant	K12118	GO:0043231//intracellular membrane-bounded organelle	GO:0009881//photoreceptor activity;GO:0016301//kinase activity;GO:0016830//carbon-carbon lyase activity;GO:0032550//purine ribonucleoside binding;GO:0046983//protein dimerization activity	GO:0001558//regulation of cell growth;GO:0006259//DNA metabolic process;GO:0006468//protein phosphorylation;GO:0007623//circadian rhythm;GO:0009639//response to red or far red light;GO:0009812//flavonoid metabolic process;GO:0030522//intracellular receptor signaling pathway;GO:0043269//regulation of ion transport;GO:0044710//single-organism metabolic process;GO:0048509//regulation of meristem dev…
Isoform0092212	0.963333	0.98	CRY1a	cryptochrome 1a [Chrysanthemum lavandulifolium]	Organismal Systems	Environmental adaptation	ko04712//Circadian rhythm - plant	K12118	GO:0043231//intracellular membrane-bounded organelle	GO:0009881//photoreceptor activity;GO:0016301//kinase activity;GO:0016830//carbon-carbon lyase activity;GO:0032550//purine ribonucleoside binding;GO:0046983//protein dimerization activity	GO:0001558//regulation of cell growth;GO:0006259//DNA metabolic process;GO:0006468//protein phosphorylation;GO:0007623//circadian rhythm;GO:0009639//response to red or far red light;GO:0009812//flavonoid metabolic process;GO:0030522//intracellular receptor signaling pathway;GO:0043269//regulation of ion transport;GO:0044710//single-organism metabolic process;GO:0048509//regulation of meristem dev…
Isoform0096593	0.643333	0.206667	CRY1	cryptochrome I, partial [Phaseolus vulgaris]	Organismal Systems	Environmental adaptation	ko04712//Circadian rhythm - plant	K12118	-	-	-
Isoform0098968	1.14333	1.15667	CRY1a	cryptochrome 1a [Chrysanthemum lavandulifolium]	Organismal Systems	Environmental adaptation	ko04712//Circadian rhythm - plant	K12118	-	-	GO:0006259//DNA metabolic process
Isoform0102129	0.293333	0.0966667	CRY1	Cryptochrome C-terminal [Cynara cardunculus var. scolymus] [Cynara cardunculus]	Organismal Systems	Environmental adaptation	ko04712//Circadian rhythm - plant	K12118	-	-	-
Isoform0102746	0.576667	0.19	CRY1	cryptochrome I, partial [Phaseolus vulgaris]	Organismal Systems	Environmental adaptation	ko04712//Circadian rhythm - plant	K12118	-	-	-
Isoform0117993	3.42667	3.45	CRY2	cryptochrome 2 [Chrysanthemum lavandulifolium]	Organismal Systems	Environmental adaptation	ko04712//Circadian rhythm - plant	K12119	GO:0043231//intracellular membrane-bounded organelle	GO:0009881//photoreceptor activity;GO:0016830//carbon-carbon lyase activity;GO:0032550//purine ribonucleoside binding;GO:0046983//protein dimerization activity	GO:0006259//DNA metabolic process;GO:0006464//cellular protein modification process;GO:0006950//response to stress;GO:0007623//circadian rhythm;GO:0009416//response to light stimulus;GO:0009606//tropism;GO:0009909//regulation of flower development;GO:0016568//chromatin modification;GO:0030522//intracellular receptor signaling pathway;GO:0042743//hydrogen peroxide metabolic process;GO:0048509//reg…
Isoform0119343	0.9	0.963333	CRY1a	cryptochrome 1a [Chrysanthemum lavandulifolium]	Organismal Systems	Environmental adaptation	ko04712//Circadian rhythm - plant	K12118	-	-	GO:0006259//DNA metabolic process
Isoform0122367	2.12	2.16667	CRY1	blue-light photoreceptor [Artemisia annua]	Organismal Systems	Environmental adaptation	ko04712//Circadian rhythm - plant	K12118	GO:0043231//intracellular membrane-bounded organelle	GO:0009881//photoreceptor activity;GO:0016301//kinase activity;GO:0016830//carbon-carbon lyase activity;GO:0032550//purine ribonucleoside binding;GO:0046983//protein dimerization activity	GO:0001558//regulation of cell growth;GO:0006259//DNA metabolic process;GO:0006468//protein phosphorylation;GO:0007623//circadian rhythm;GO:0009639//response to red or far red light;GO:0009812//flavonoid metabolic process;GO:0030522//intracellular receptor signaling pathway;GO:0043269//regulation of ion transport;GO:0044710//single-organism metabolic process;GO:0048509//regulation of meristem dev…
Isoform0122662	4.02	4.16333	CRY2	cryptochrome 2 [Chrysanthemum lavandulifolium]	Organismal Systems	Environmental adaptation	ko04712//Circadian rhythm - plant	K12119	-	-	GO:0006259//DNA metabolic process
Isoform0122751	4.97667	4.14667	CRY2	cryptochrome 2 [Chrysanthemum lavandulifolium]	Organismal Systems	Environmental adaptation	ko04712//Circadian rhythm - plant	K12119	GO:0043231//intracellular membrane-bounded organelle	GO:0009881//photoreceptor activity;GO:0016830//carbon-carbon lyase activity;GO:0032550//purine ribonucleoside binding;GO:0046983//protein dimerization activity	GO:0006259//DNA metabolic process;GO:0006464//cellular protein modification process;GO:0006950//response to stress;GO:0007623//circadian rhythm;GO:0009416//response to light stimulus;GO:0009606//tropism;GO:0009909//regulation of flower development;GO:0016568//chromatin modification;GO:0030522//intracellular receptor signaling pathway;GO:0042743//hydrogen peroxide metabolic process;GO:0048509//reg…
Isoform0123957	2.85667	2.52333	CRY1a	cryptochrome 1a [Chrysanthemum lavandulifolium]	Organismal Systems	Environmental adaptation	ko04712//Circadian rhythm - plant	K12118	GO:0043231//intracellular membrane-bounded organelle	GO:0009881//photoreceptor activity;GO:0016301//kinase activity;GO:0016830//carbon-carbon lyase activity;GO:0032550//purine ribonucleoside binding;GO:0046983//protein dimerization activity	GO:0001558//regulation of cell growth;GO:0006259//DNA metabolic process;GO:0006468//protein phosphorylation;GO:0007623//circadian rhythm;GO:0009639//response to red or far red light;GO:0009812//flavonoid metabolic process;GO:0030522//intracellular receptor signaling pathway;GO:0043269//regulation of ion transport;GO:0044710//single-organism metabolic process;GO:0048509//regulation of meristem dev…
Isoform0125613	0.946667	0.796667	CRY1a	cryptochrome 1a [Chrysanthemum lavandulifolium]	Organismal Systems	Environmental adaptation	ko04712//Circadian rhythm - plant	K12118	GO:0043231//intracellular membrane-bounded organelle	GO:0009881//photoreceptor activity;GO:0016301//kinase activity;GO:0016830//carbon-carbon lyase activity;GO:0032550//purine ribonucleoside binding;GO:0046983//protein dimerization activity	GO:0001558//regulation of cell growth;GO:0006259//DNA metabolic process;GO:0006468//protein phosphorylation;GO:0007623//circadian rhythm;GO:0009639//response to red or far red light;GO:0009812//flavonoid metabolic process;GO:0030522//intracellular receptor signaling pathway;GO:0043269//regulation of ion transport;GO:0044710//single-organism metabolic process;GO:0048509//regulation of meristem dev…
Isoform0126527	7.37667	5.64667	CRY1	cryptochrome 1.2 [Chrysanthemum boreale]	Organismal Systems	Environmental adaptation	ko04712//Circadian rhythm - plant	K12118	GO:0043231//intracellular membrane-bounded organelle	GO:0009881//photoreceptor activity;GO:0016301//kinase activity;GO:0016830//carbon-carbon lyase activity;GO:0032550//purine ribonucleoside binding;GO:0046983//protein dimerization activity	GO:0001558//regulation of cell growth;GO:0006259//DNA metabolic process;GO:0006468//protein phosphorylation;GO:0007623//circadian rhythm;GO:0009639//response to red or far red light;GO:0009812//flavonoid metabolic process;GO:0030522//intracellular receptor signaling pathway;GO:0043269//regulation of ion transport;GO:0044710//single-organism metabolic process;GO:0048509//regulation of meristem dev…
Isoform0006090	2.56	1.54667	PKS3	PREDICTED: protein PHYTOCHROME KINASE SUBSTRATE 3-like [Capsicum annuum]	-	-	-	-	-	-	-
Isoform0012630	28.7733	37.9033	FYPP3	PREDICTED: phytochrome-associated serine/threonine-protein phosphatase 3 isoform X1 [Daucus carota subsp. sativus] [Daucus carota]	-	-	-	-	GO:0008287//protein serine/threonine phosphatase complex;GO:0043231//intracellular membrane-bounded organelle	GO:0004672//protein kinase activity;GO:0004721//phosphoprotein phosphatase activity;GO:0043169//cation binding	GO:0006796//phosphate-containing compound metabolic process;GO:0009404//toxin metabolic process;GO:0009909//regulation of flower development
Isoform0014523	9.11	24.5867	PKS1	PREDICTED: protein PHYTOCHROME KINASE SUBSTRATE 2 [Citrus sinensis]	-	-	-	-	-	-	-
Isoform0014530	1.17333	6.36	PKS1	PREDICTED: protein PHYTOCHROME KINASE SUBSTRATE 2 [Citrus sinensis]	-	-	-	-	-	-	-
Isoform0014531	12.0033	14.8533	FYPP3	PREDICTED: phytochrome-associated serine/threonine-protein phosphatase 3 isoform X1 [Daucus carota subsp. sativus] [Daucus carota]	-	-	-	-	-	GO:0003824//catalytic activity	GO:0006796//phosphate-containing compound metabolic process
Isoform0020689	2.22	3.74	PIF1	phytochrome interacting factor 1 [Catharanthus roseus]	-	-	-	-	-	-	GO:0009791//post-embryonic development;GO:0044249//cellular biosynthetic process;GO:0044763//single-organism cellular process;GO:0050789//regulation of biological process;GO:0050896//response to stimulus;GO:1901576//organic substance biosynthetic process
Isoform0021909	12.7667	16.08	FYPP3	PREDICTED: phytochrome-associated serine/threonine-protein phosphatase 3 isoform X1 [Daucus carota subsp. sativus] [Daucus carota]	-	-	-	-	-	GO:0003824//catalytic activity	GO:0006796//phosphate-containing compound metabolic process
Isoform0037217	0.28	0.366667	PHYB	phytochrome b [Chrysanthemum seticuspe f. boreale]	Organismal Systems	Environmental adaptation	ko04712//Circadian rhythm - plant	K12121	-	GO:0038023//signaling receptor activity;GO:0046983//protein dimerization activity	GO:0006464//cellular protein modification process;GO:0007602//phototransduction;GO:0010468//regulation of gene expression;GO:0034645//cellular macromolecule biosynthetic process;GO:0035556//intracellular signal transduction
Isoform0041316	0.933333	5.07	PHYA1	phytochrome a [Chrysanthemum seticuspe f. boreale]	Organismal Systems	Environmental adaptation	ko04712//Circadian rhythm - plant	K12120	GO:0016604//nuclear body	GO:0009883//red or far-red light photoreceptor activity;GO:0032550//purine ribonucleoside binding;GO:0046983//protein dimerization activity	GO:0006417//regulation of translation;GO:0006464//cellular protein modification process;GO:0007602//phototransduction;GO:0009606//tropism;GO:0010017//red or far-red light signaling pathway;GO:0010114//response to red light;GO:0010218//response to far red light;GO:0035556//intracellular signal transduction;GO:0042221//response to chemical;GO:0048511//rhythmic process
Isoform0047170	0.346667	0.87	PHYB	phytochrome b [Chrysanthemum seticuspe f. boreale]	Organismal Systems	Environmental adaptation	ko04712//Circadian rhythm - plant	K12121	-	-	-
Isoform0052154	2.20667	1.69333	PHYC	phytochrome C [Vitis riparia]	Organismal Systems	Environmental adaptation	ko04712//Circadian rhythm - plant	K12120	-	GO:0032550//purine ribonucleoside binding;GO:0038023//signaling receptor activity;GO:0046983//protein dimerization activity	GO:0006468//protein phosphorylation;GO:0007602//phototransduction;GO:0009606//tropism;GO:0010468//regulation of gene expression;GO:0034645//cellular macromolecule biosynthetic process;GO:0035556//intracellular signal transduction;GO:0043269//regulation of ion transport;GO:0048511//rhythmic process
Isoform0052170	0.91	1.14667	FYPP	phytochrome-associated serine/threonine-protein phosphatase [Dorcoceras hygrometricum]	-	-	-	-	-	GO:0003824//catalytic activity	GO:0006796//phosphate-containing compound metabolic process
Isoform0053836	2.32	2.7	PHYB	phytochrome b [Chrysanthemum seticuspe f. boreale]	Organismal Systems	Environmental adaptation	ko04712//Circadian rhythm - plant	K12121	-	-	-
Isoform0054680	0.766667	1.05667	PHYB	phytochrome b [Chrysanthemum seticuspe f. boreale]	Organismal Systems	Environmental adaptation	ko04712//Circadian rhythm - plant	K12121	-	GO:0038023//signaling receptor activity;GO:0046983//protein dimerization activity	GO:0006464//cellular protein modification process;GO:0007602//phototransduction;GO:0010468//regulation of gene expression;GO:0034645//cellular macromolecule biosynthetic process;GO:0035556//intracellular signal transduction
Isoform0059891	0.166667	0.386667	PHYB	PREDICTED: phytochrome B [Ziziphus jujuba]	Organismal Systems	Environmental adaptation	ko04712//Circadian rhythm - plant	K12121	-	GO:0038023//signaling receptor activity;GO:0046983//protein dimerization activity	GO:0006464//cellular protein modification process;GO:0007602//phototransduction;GO:0010468//regulation of gene expression;GO:0034645//cellular macromolecule biosynthetic process;GO:0035556//intracellular signal transduction
Isoform0061814	2.08333	3.14333	PIF1	phytochrome interacting factor 1 [Catharanthus roseus]	-	-	-	-	-	-	GO:0009791//post-embryonic development;GO:0044249//cellular biosynthetic process;GO:0044763//single-organism cellular process;GO:0050789//regulation of biological process;GO:0050896//response to stimulus;GO:1901576//organic substance biosynthetic process
Isoform0066892	0.0966667	0.18	PHYA1	phytochrome a [Chrysanthemum seticuspe f. boreale]	Organismal Systems	Environmental adaptation	ko04712//Circadian rhythm - plant	K12120	GO:0016604//nuclear body	GO:0009883//red or far-red light photoreceptor activity;GO:0032550//purine ribonucleoside binding;GO:0046983//protein dimerization activity	GO:0006417//regulation of translation;GO:0006464//cellular protein modification process;GO:0007602//phototransduction;GO:0009606//tropism;GO:0010017//red or far-red light signaling pathway;GO:0010114//response to red light;GO:0010218//response to far red light;GO:0035556//intracellular signal transduction;GO:0042221//response to chemical;GO:0048511//rhythmic process
Isoform0067292	0.623333	0.593333	PHYB	phytochrome b [Chrysanthemum seticuspe f. boreale]	Organismal Systems	Environmental adaptation	ko04712//Circadian rhythm - plant	K12121	-	GO:0038023//signaling receptor activity;GO:0046983//protein dimerization activity	GO:0006464//cellular protein modification process;GO:0007602//phototransduction;GO:0010468//regulation of gene expression;GO:0034645//cellular macromolecule biosynthetic process;GO:0035556//intracellular signal transduction
Isoform0068304	0.8	3.34333	PHYA1	phytochrome a [Chrysanthemum seticuspe f. boreale]	Organismal Systems	Environmental adaptation	ko04712//Circadian rhythm - plant	K12120	GO:0016604//nuclear body	GO:0009883//red or far-red light photoreceptor activity;GO:0032550//purine ribonucleoside binding;GO:0046983//protein dimerization activity	GO:0006417//regulation of translation;GO:0006464//cellular protein modification process;GO:0007602//phototransduction;GO:0009606//tropism;GO:0010017//red or far-red light signaling pathway;GO:0010114//response to red light;GO:0010218//response to far red light;GO:0035556//intracellular signal transduction;GO:0042221//response to chemical;GO:0048511//rhythmic process
Isoform0070680	0.246667	1.11667	PHYA1	phytochrome a [Chrysanthemum seticuspe f. boreale]	Organismal Systems	Environmental adaptation	ko04712//Circadian rhythm - plant	K12120	GO:0016604//nuclear body	GO:0009883//red or far-red light photoreceptor activity;GO:0032550//purine ribonucleoside binding;GO:0046983//protein dimerization activity	GO:0006417//regulation of translation;GO:0006464//cellular protein modification process;GO:0007602//phototransduction;GO:0009606//tropism;GO:0010017//red or far-red light signaling pathway;GO:0010114//response to red light;GO:0010218//response to far red light;GO:0035556//intracellular signal transduction;GO:0042221//response to chemical;GO:0048511//rhythmic process
Isoform0073094	0.223333	1.29	PHYA1	phytochrome a [Chrysanthemum seticuspe f. boreale]	Organismal Systems	Environmental adaptation	ko04712//Circadian rhythm - plant	K12120	GO:0016604//nuclear body	GO:0009883//red or far-red light photoreceptor activity;GO:0032550//purine ribonucleoside binding;GO:0046983//protein dimerization activity	GO:0006417//regulation of translation;GO:0006464//cellular protein modification process;GO:0007602//phototransduction;GO:0009606//tropism;GO:0010017//red or far-red light signaling pathway;GO:0010114//response to red light;GO:0010218//response to far red light;GO:0035556//intracellular signal transduction;GO:0042221//response to chemical;GO:0048511//rhythmic process
Isoform0075653	0.876667	0.753333	PHYB	phytochrome b [Chrysanthemum seticuspe f. boreale]	Organismal Systems	Environmental adaptation	ko04712//Circadian rhythm - plant	K12121	-	GO:0038023//signaling receptor activity;GO:0046983//protein dimerization activity	GO:0006464//cellular protein modification process;GO:0007602//phototransduction;GO:0010468//regulation of gene expression;GO:0034645//cellular macromolecule biosynthetic process;GO:0035556//intracellular signal transduction
Isoform0077737	0.306667	0.18	PHYB	phytochrome b [Chrysanthemum seticuspe f. boreale]	Organismal Systems	Environmental adaptation	ko04712//Circadian rhythm - plant	K12121	-	GO:0038023//signaling receptor activity;GO:0046983//protein dimerization activity	GO:0006464//cellular protein modification process;GO:0007602//phototransduction;GO:0010468//regulation of gene expression;GO:0034645//cellular macromolecule biosynthetic process;GO:0035556//intracellular signal transduction
Isoform0079337	2.15333	12.2933	PHYA1	phytochrome a [Chrysanthemum seticuspe f. boreale]	Organismal Systems	Environmental adaptation	ko04712//Circadian rhythm - plant	K12120	GO:0016604//nuclear body	GO:0009883//red or far-red light photoreceptor activity;GO:0032550//purine ribonucleoside binding;GO:0046983//protein dimerization activity	GO:0006417//regulation of translation;GO:0006464//cellular protein modification process;GO:0007602//phototransduction;GO:0009606//tropism;GO:0010017//red or far-red light signaling pathway;GO:0010114//response to red light;GO:0010218//response to far red light;GO:0035556//intracellular signal transduction;GO:0042221//response to chemical;GO:0048511//rhythmic process
Isoform0079776	0.283333	0.716667	PHYB	PREDICTED: phytochrome B [Ziziphus jujuba]	Organismal Systems	Environmental adaptation	ko04712//Circadian rhythm - plant	K12121	-	GO:0038023//signaling receptor activity;GO:0046983//protein dimerization activity	GO:0006464//cellular protein modification process;GO:0007602//phototransduction;GO:0010468//regulation of gene expression;GO:0034645//cellular macromolecule biosynthetic process;GO:0035556//intracellular signal transduction
Isoform0079847	0.383333	0.366667	PHYB	phytochrome b [Chrysanthemum seticuspe f. boreale]	Organismal Systems	Environmental adaptation	ko04712//Circadian rhythm - plant	K12121	-	GO:0004673//protein histidine kinase activity;GO:0038023//signaling receptor activity;GO:0046983//protein dimerization activity	GO:0006464//cellular protein modification process;GO:0007602//phototransduction;GO:0010468//regulation of gene expression;GO:0034645//cellular macromolecule biosynthetic process;GO:0035556//intracellular signal transduction
Isoform0081521	0.663333	0.683333	PHYB	phytochrome b [Chrysanthemum seticuspe f. boreale]	Organismal Systems	Environmental adaptation	ko04712//Circadian rhythm - plant	K12121	-	GO:0004871//signal transducer activity	GO:0006464//cellular protein modification process;GO:0007165//signal transduction;GO:0009583//detection of light stimulus;GO:0010467//gene expression;GO:0034645//cellular macromolecule biosynthetic process
Isoform0084339	2.61667	3.10333	PHYB	phytochrome b [Chrysanthemum seticuspe f. boreale]	Organismal Systems	Environmental adaptation	ko04712//Circadian rhythm - plant	K12121	-	GO:0038023//signaling receptor activity;GO:0046983//protein dimerization activity	GO:0006464//cellular protein modification process;GO:0007602//phototransduction;GO:0010468//regulation of gene expression;GO:0034645//cellular macromolecule biosynthetic process;GO:0035556//intracellular signal transduction
Isoform0084446	2.06667	2.26333	PHYB	phytochrome b [Chrysanthemum seticuspe f. boreale]	Organismal Systems	Environmental adaptation	ko04712//Circadian rhythm - plant	K12121	-	GO:0038023//signaling receptor activity;GO:0046983//protein dimerization activity	GO:0006464//cellular protein modification process;GO:0007602//phototransduction;GO:0010468//regulation of gene expression;GO:0034645//cellular macromolecule biosynthetic process;GO:0035556//intracellular signal transduction
Isoform0084520	1.53667	1.71667	PHYB	phytochrome b [Chrysanthemum seticuspe f. boreale]	Organismal Systems	Environmental adaptation	ko04712//Circadian rhythm - plant	K12121	-	GO:0038023//signaling receptor activity;GO:0046983//protein dimerization activity	GO:0006464//cellular protein modification process;GO:0007602//phototransduction;GO:0010468//regulation of gene expression;GO:0034645//cellular macromolecule biosynthetic process;GO:0035556//intracellular signal transduction
Isoform0087924	0.306667	0.356667	PHYB	phytochrome b [Chrysanthemum seticuspe f. boreale]	Organismal Systems	Environmental adaptation	ko04712//Circadian rhythm - plant	K12121	-	GO:0038023//signaling receptor activity;GO:0046983//protein dimerization activity	GO:0006464//cellular protein modification process;GO:0007602//phototransduction;GO:0010468//regulation of gene expression;GO:0034645//cellular macromolecule biosynthetic process;GO:0035556//intracellular signal transduction
Isoform0089841	1.91667	2.33	PHYB	phytochrome b [Chrysanthemum seticuspe f. boreale]	Organismal Systems	Environmental adaptation	ko04712//Circadian rhythm - plant	K12121	-	GO:0038023//signaling receptor activity;GO:0046983//protein dimerization activity	GO:0006464//cellular protein modification process;GO:0007602//phototransduction;GO:0010468//regulation of gene expression;GO:0034645//cellular macromolecule biosynthetic process;GO:0035556//intracellular signal transduction
Isoform0090584	0.893333	0.683333	PHYB	phytochrome b [Chrysanthemum seticuspe f. boreale]	Organismal Systems	Environmental adaptation	ko04712//Circadian rhythm - plant	K12121	-	GO:0038023//signaling receptor activity;GO:0046983//protein dimerization activity	GO:0006464//cellular protein modification process;GO:0007602//phototransduction;GO:0010468//regulation of gene expression;GO:0034645//cellular macromolecule biosynthetic process;GO:0035556//intracellular signal transduction
Isoform0091167	1.47667	3.73	PHYB	phytochrome b [Chrysanthemum seticuspe f. boreale]	Organismal Systems	Environmental adaptation	ko04712//Circadian rhythm - plant	K12121	-	GO:0038023//signaling receptor activity;GO:0046983//protein dimerization activity	GO:0006464//cellular protein modification process;GO:0007602//phototransduction;GO:0010468//regulation of gene expression;GO:0034645//cellular macromolecule biosynthetic process;GO:0035556//intracellular signal transduction
Isoform0093050	0.206667	1.21667	PHYA1	phytochrome a [Chrysanthemum seticuspe f. boreale]	Organismal Systems	Environmental adaptation	ko04712//Circadian rhythm - plant	K12120	GO:0016604//nuclear body	GO:0009883//red or far-red light photoreceptor activity;GO:0032550//purine ribonucleoside binding;GO:0046983//protein dimerization activity	GO:0006417//regulation of translation;GO:0006464//cellular protein modification process;GO:0007602//phototransduction;GO:0009606//tropism;GO:0010017//red or far-red light signaling pathway;GO:0010114//response to red light;GO:0010218//response to far red light;GO:0035556//intracellular signal transduction;GO:0042221//response to chemical;GO:0048511//rhythmic process
Isoform0093189	0.363333	0.503333	PHYB	phytochrome b [Chrysanthemum seticuspe f. boreale]	Organismal Systems	Environmental adaptation	ko04712//Circadian rhythm - plant	K12121	-	-	-
Isoform0094230	0.2	1.14	PHYA1	phytochrome a [Chrysanthemum seticuspe f. boreale]	Organismal Systems	Environmental adaptation	ko04712//Circadian rhythm - plant	K12120	GO:0016604//nuclear body	GO:0009883//red or far-red light photoreceptor activity;GO:0032550//purine ribonucleoside binding;GO:0046983//protein dimerization activity	GO:0006417//regulation of translation;GO:0006464//cellular protein modification process;GO:0007602//phototransduction;GO:0009606//tropism;GO:0010017//red or far-red light signaling pathway;GO:0010114//response to red light;GO:0010218//response to far red light;GO:0035556//intracellular signal transduction;GO:0042221//response to chemical;GO:0048511//rhythmic process
Isoform0094673	0.18	1.00667	PHYA1	phytochrome a [Chrysanthemum seticuspe f. boreale]	Organismal Systems	Environmental adaptation	ko04712//Circadian rhythm - plant	K12120	GO:0016604//nuclear body	GO:0009883//red or far-red light photoreceptor activity;GO:0032550//purine ribonucleoside binding;GO:0046983//protein dimerization activity	GO:0006417//regulation of translation;GO:0006464//cellular protein modification process;GO:0007602//phototransduction;GO:0009606//tropism;GO:0010017//red or far-red light signaling pathway;GO:0010114//response to red light;GO:0010218//response to far red light;GO:0035556//intracellular signal transduction;GO:0042221//response to chemical;GO:0048511//rhythmic process
Isoform0095945	0.19	0.916667	PHYA1	phytochrome a [Chrysanthemum seticuspe f. boreale]	Organismal Systems	Environmental adaptation	ko04712//Circadian rhythm - plant	K12120	GO:0016604//nuclear body	GO:0009883//red or far-red light photoreceptor activity;GO:0032550//purine ribonucleoside binding;GO:0046983//protein dimerization activity	GO:0006417//regulation of translation;GO:0006464//cellular protein modification process;GO:0007602//phototransduction;GO:0009606//tropism;GO:0010017//red or far-red light signaling pathway;GO:0010114//response to red light;GO:0010218//response to far red light;GO:0035556//intracellular signal transduction;GO:0042221//response to chemical;GO:0048511//rhythmic process
Isoform0096421	0.313333	1.7	PHYA1	phytochrome a [Chrysanthemum seticuspe f. boreale]	Organismal Systems	Environmental adaptation	ko04712//Circadian rhythm - plant	K12120	GO:0016604//nuclear body	GO:0009883//red or far-red light photoreceptor activity;GO:0032550//purine ribonucleoside binding;GO:0046983//protein dimerization activity	GO:0006417//regulation of translation;GO:0006464//cellular protein modification process;GO:0007602//phototransduction;GO:0009606//tropism;GO:0010017//red or far-red light signaling pathway;GO:0010114//response to red light;GO:0010218//response to far red light;GO:0035556//intracellular signal transduction;GO:0042221//response to chemical;GO:0048511//rhythmic process
Isoform0101834	0.306667	0.616667	PHYB	PREDICTED: phytochrome B [Ziziphus jujuba]	Organismal Systems	Environmental adaptation	ko04712//Circadian rhythm - plant	K12121	-	GO:0038023//signaling receptor activity;GO:0046983//protein dimerization activity	GO:0006464//cellular protein modification process;GO:0007602//phototransduction;GO:0010468//regulation of gene expression;GO:0034645//cellular macromolecule biosynthetic process;GO:0035556//intracellular signal transduction
Isoform0102942	0.21	0.406667	PHYB	PREDICTED: phytochrome B [Ziziphus jujuba]	Organismal Systems	Environmental adaptation	ko04712//Circadian rhythm - plant	K12121	-	GO:0038023//signaling receptor activity;GO:0046983//protein dimerization activity	GO:0006464//cellular protein modification process;GO:0007602//phototransduction;GO:0010468//regulation of gene expression;GO:0034645//cellular macromolecule biosynthetic process;GO:0035556//intracellular signal transduction
Isoform0103133	0.136667	0.996667	PHYA1	phytochrome a [Chrysanthemum seticuspe f. boreale]	Organismal Systems	Environmental adaptation	ko04712//Circadian rhythm - plant	K12120	GO:0016604//nuclear body	GO:0009883//red or far-red light photoreceptor activity;GO:0032550//purine ribonucleoside binding;GO:0046983//protein dimerization activity	GO:0006417//regulation of translation;GO:0006464//cellular protein modification process;GO:0007602//phototransduction;GO:0009606//tropism;GO:0010017//red or far-red light signaling pathway;GO:0010114//response to red light;GO:0010218//response to far red light;GO:0035556//intracellular signal transduction;GO:0042221//response to chemical;GO:0048511//rhythmic process
Isoform0103560	0.243333	0.773333	PHYB	PREDICTED: phytochrome B [Ziziphus jujuba]	Organismal Systems	Environmental adaptation	ko04712//Circadian rhythm - plant	K12121	-	GO:0038023//signaling receptor activity;GO:0046983//protein dimerization activity	GO:0006464//cellular protein modification process;GO:0007602//phototransduction;GO:0010468//regulation of gene expression;GO:0034645//cellular macromolecule biosynthetic process;GO:0035556//intracellular signal transduction
Isoform0125119	0.45	2.39333	PHYA1	phytochrome a [Chrysanthemum seticuspe f. boreale]	Organismal Systems	Environmental adaptation	ko04712//Circadian rhythm - plant	K12120	GO:0016604//nuclear body	GO:0009883//red or far-red light photoreceptor activity;GO:0032550//purine ribonucleoside binding;GO:0046983//protein dimerization activity	GO:0006417//regulation of translation;GO:0006464//cellular protein modification process;GO:0007602//phototransduction;GO:0009606//tropism;GO:0010017//red or far-red light signaling pathway;GO:0010114//response to red light;GO:0010218//response to far red light;GO:0035556//intracellular signal transduction;GO:0042221//response to chemical;GO:0048511//rhythmic process
Isoform0126325	0.643333	0.89	PHYB	phytochrome b [Chrysanthemum seticuspe f. boreale]	Organismal Systems	Environmental adaptation	ko04712//Circadian rhythm - plant	K12121	-	GO:0038023//signaling receptor activity;GO:0046983//protein dimerization activity	GO:0006464//cellular protein modification process;GO:0007602//phototransduction;GO:0010468//regulation of gene expression;GO:0034645//cellular macromolecule biosynthetic process;GO:0035556//intracellular signal transduction
Isoform0128977	0.186667	1.22	PHYA1	phytochrome a [Chrysanthemum seticuspe f. boreale]	Organismal Systems	Environmental adaptation	ko04712//Circadian rhythm - plant	K12120	GO:0016604//nuclear body	GO:0009883//red or far-red light photoreceptor activity;GO:0032550//purine ribonucleoside binding;GO:0046983//protein dimerization activity	GO:0006417//regulation of translation;GO:0006464//cellular protein modification process;GO:0007602//phototransduction;GO:0009606//tropism;GO:0010017//red or far-red light signaling pathway;GO:0010114//response to red light;GO:0010218//response to far red light;GO:0035556//intracellular signal transduction;GO:0042221//response to chemical;GO:0048511//rhythmic process
Isoform0027901	24.6933	21.9967	FKF1	flavin-binding kelch repeat F-box 1, partial [Helianthus annuus]	Organismal Systems	Environmental adaptation	ko04712//Circadian rhythm - plant	K12116	-	-	-
Isoform0032845	8.82667	6.66667	FKF1	flavin-binding kelch repeat F-box 1, partial [Helianthus annuus]	Organismal Systems	Environmental adaptation	ko04712//Circadian rhythm - plant	K12116	-	-	-
Isoform0033738	17.4933	16.6533	FKF1	flavin-binding kelch repeat F-box 1, partial [Helianthus annuus]	Organismal Systems	Environmental adaptation	ko04712//Circadian rhythm - plant	K12116	-	-	-
Isoform0035490	20.7333	19.34	FKF1	flavin-binding kelch repeat F-box 1, partial [Helianthus annuus]	Organismal Systems	Environmental adaptation	ko04712//Circadian rhythm - plant	K12116	-	-	-
Isoform0046985	19.93	18.36	FKF1	flavin-binding kelch repeat F-box 1, partial [Helianthus annuus]	Organismal Systems	Environmental adaptation	ko04712//Circadian rhythm - plant	K12116	-	-	-
Isoform0047291	16.8933	15.6467	FKF1	flavin-binding kelch repeat F-box 1, partial [Helianthus annuus]	Organismal Systems	Environmental adaptation	ko04712//Circadian rhythm - plant	K12116	-	-	-
Isoform0047432	13.6467	10.9833	FKF1	flavin-binding kelch repeat F-box 1, partial [Helianthus annuus]	Organismal Systems	Environmental adaptation	ko04712//Circadian rhythm - plant	K12116	-	-	-
Isoform0049091	12.6267	11.3133	FKF1	flavin-binding kelch repeat F-box 1, partial [Helianthus annuus]	Organismal Systems	Environmental adaptation	ko04712//Circadian rhythm - plant	K12116	-	-	-
Isoform0063651	10.67	9.91333	FKF1	flavin-binding kelch repeat F-box 1, partial [Helianthus annuus]	Organismal Systems	Environmental adaptation	ko04712//Circadian rhythm - plant	K12116	-	-	-
Isoform0121617	2.13	1.98	FKF1	flavin-binding kelch repeat F-box 1, partial [Helianthus annuus]	Organismal Systems	Environmental adaptation	ko04712//Circadian rhythm - plant	K12116	-	-	-
Isoform0123986	4.39	3.89667	FKF1	flavin-binding kelch repeat F-box 1, partial [Helianthus annuus]	Organismal Systems	Environmental adaptation	ko04712//Circadian rhythm - plant	K12116	-	-	-
Isoform0124927	0.79	0.646667	FKF1	flavin-binding kelch repeat F-box 1, partial [Helianthus annuus]	Organismal Systems	Environmental adaptation	ko04712//Circadian rhythm - plant	K12116	-	-	-
Isoform0016464	0.143333	0.123333	LHY	late elongated hypocotyl-like [Chrysanthemum seticuspe f. boreale]	Organismal Systems	Environmental adaptation	ko04712//Circadian rhythm - plant	K12133	-	-	-
Isoform0023809	1.38	0.483333	LHY	late elongated hypocotyl-like [Chrysanthemum seticuspe f. boreale]	Organismal Systems	Environmental adaptation	ko04712//Circadian rhythm - plant	K12133	-	-	-
Isoform0028456	0.3	0.246667	LHY	late elongated hypocotyl-like [Chrysanthemum seticuspe f. boreale]	Organismal Systems	Environmental adaptation	ko04712//Circadian rhythm - plant	K12133	-	-	-
Isoform0031720	0.12	0.2	LHY	late elongated hypocotyl-like [Chrysanthemum seticuspe f. boreale]	Organismal Systems	Environmental adaptation	ko04712//Circadian rhythm - plant	K12133	-	-	-
Isoform0031779	0.836667	0.316667	LHY	late elongated hypocotyl-like [Chrysanthemum seticuspe f. boreale]	Genetic Information Processing	Folding, sorting and degradation	ko04141//Protein processing in endoplasmic reticulum	K11718	-	-	-
Isoform0035251	0.163333	0.13	LHY	late elongated hypocotyl-like [Chrysanthemum seticuspe f. boreale]	Organismal Systems	Environmental adaptation	ko04712//Circadian rhythm - plant	K12133	-	-	-
Isoform0050296	0.283333	0.193333	LHY	late elongated hypocotyl-like [Chrysanthemum seticuspe f. boreale]	Organismal Systems	Environmental adaptation	ko04712//Circadian rhythm - plant	K12133	-	-	-
Isoform0057663	0.25	0.0633333	LHY	late elongated hypocotyl-like [Chrysanthemum seticuspe f. boreale]	Organismal Systems	Environmental adaptation	ko04712//Circadian rhythm - plant	K12133	-	-	-
Isoform0058257	0.133333	0.0633333	LHY	late elongated hypocotyl-like [Chrysanthemum seticuspe f. boreale]	Organismal Systems	Environmental adaptation	ko04712//Circadian rhythm - plant	K12133	-	-	-
Isoform0058886	0.62	0.386667	LHY	late elongated hypocotyl-like [Chrysanthemum seticuspe f. boreale]	Organismal Systems	Environmental adaptation	ko04712//Circadian rhythm - plant	K12133	-	-	-
Isoform0064042	0.193333	0.246667	LHY	late elongated hypocotyl-like [Chrysanthemum seticuspe f. boreale]	Organismal Systems	Environmental adaptation	ko04712//Circadian rhythm - plant	K12133	-	-	-
Isoform0064166	0.683333	0.38	LHY	late elongated hypocotyl-like [Chrysanthemum seticuspe f. boreale]	Organismal Systems	Environmental adaptation	ko04712//Circadian rhythm - plant	K12133	-	-	-
Isoform0072151	0.143333	0.22	LHY	late elongated hypocotyl-like [Chrysanthemum seticuspe f. boreale]	Organismal Systems	Environmental adaptation	ko04712//Circadian rhythm - plant	K12133	-	-	-
Isoform0080854	0.416667	0.27	LHY	late elongated hypocotyl-like [Chrysanthemum seticuspe f. boreale]	Organismal Systems	Environmental adaptation	ko04712//Circadian rhythm - plant	K12133	-	-	-
Isoform0084548	0.3	0.12	LHY	late elongated hypocotyl-like [Chrysanthemum seticuspe f. boreale]	Organismal Systems	Environmental adaptation	ko04712//Circadian rhythm - plant	K12133	-	-	-
Isoform0089501	0.03	0.0366667	LHY	late elongated hypocotyl-like [Chrysanthemum seticuspe f. boreale]	Organismal Systems	Environmental adaptation	ko04712//Circadian rhythm - plant	K12133	-	-	-
Isoform0091440	0.57	0.236667	LHY	late elongated hypocotyl-like [Chrysanthemum seticuspe f. boreale]	Organismal Systems	Environmental adaptation	ko04712//Circadian rhythm - plant	K12133	-	-	-
Isoform0096016	0.0633333	0.0533333	LHY	late elongated hypocotyl-like [Chrysanthemum seticuspe f. boreale]	Organismal Systems	Environmental adaptation	ko04712//Circadian rhythm - plant	K12133	-	-	-
Isoform0118176	0.753333	0.44	LHY	late elongated hypocotyl-like [Chrysanthemum seticuspe f. boreale]	Organismal Systems	Environmental adaptation	ko04712//Circadian rhythm - plant	K12133	-	-	-
Isoform0118692	0.86	0.386667	LHY	late elongated hypocotyl-like [Chrysanthemum seticuspe f. boreale]	Organismal Systems	Environmental adaptation	ko04712//Circadian rhythm - plant	K12133	-	-	-
Isoform0118792	0.46	0.463333	LHY	late elongated hypocotyl-like [Chrysanthemum seticuspe f. boreale]	Organismal Systems	Environmental adaptation	ko04712//Circadian rhythm - plant	K12133	-	-	-
Isoform0123423	0.686667	0.236667	LHY	late elongated hypocotyl-like [Chrysanthemum seticuspe f. boreale]	Organismal Systems	Environmental adaptation	ko04712//Circadian rhythm - plant	K12133	-	-	-
Isoform0024000	4.09333	4.35667	ELF3	PREDICTED: protein EARLY FLOWERING 3-like isoform X2 [Nicotiana sylvestris]	Organismal Systems	Environmental adaptation	ko04712//Circadian rhythm - plant	K12125	-	-	-
Isoform0030197	4.41667	5.06	ELF3	PREDICTED: protein EARLY FLOWERING 3 [Vitis vinifera]	Organismal Systems	Environmental adaptation	ko04712//Circadian rhythm - plant	K12125	-	-	-
Isoform0038158	4.63	5.35333	ELF3	PREDICTED: protein EARLY FLOWERING 3 [Vitis vinifera]	Organismal Systems	Environmental adaptation	ko04712//Circadian rhythm - plant	K12125	-	-	-
Isoform0042750	3.53	3.66667	ELF3	PREDICTED: protein EARLY FLOWERING 3 [Vitis vinifera]	Organismal Systems	Environmental adaptation	ko04712//Circadian rhythm - plant	K12125	-	-	-
Isoform0048188	1.05	1.16	ELF3	PREDICTED: protein EARLY FLOWERING 3 [Vitis vinifera]	Organismal Systems	Environmental adaptation	ko04712//Circadian rhythm - plant	K12125	-	-	GO:0044763//single-organism cellular process;GO:0050794//regulation of cellular process
Isoform0054821	6.80333	8.04333	ELF3	PREDICTED: protein EARLY FLOWERING 3 [Vitis vinifera]	Organismal Systems	Environmental adaptation	ko04712//Circadian rhythm - plant	K12125	-	-	-
Isoform0058850	3.94333	4.99	ELF3	PREDICTED: protein EARLY FLOWERING 3 [Vitis vinifera]	Organismal Systems	Environmental adaptation	ko04712//Circadian rhythm - plant	K12125	-	-	-
Isoform0070553	0.54	0.736667	PIE1	PREDICTED: protein PHOTOPERIOD-INDEPENDENT EARLY FLOWERING 1 isoform X2 [Daucus carota subsp. sativus] [Daucus carota]	-	-	-	-	-	-	-
Isoform0078971	1.69333	2.33667	ELF3	PREDICTED: protein EARLY FLOWERING 3-like isoform X2 [Nicotiana sylvestris]	Organismal Systems	Environmental adaptation	ko04712//Circadian rhythm - plant	K12125	-	-	-
Isoform0080308	0.876667	0.356667	ELF4	PREDICTED: protein EARLY FLOWERING 4-like [Juglans regia]	-	-	-	-	-	-	GO:0009639//response to red or far red light;GO:0009791//post-embryonic development;GO:0048511//rhythmic process;GO:0048608//reproductive structure development;GO:0050789//regulation of biological process
Isoform0080714	0.29	0.346667	PIE1	PREDICTED: protein PHOTOPERIOD-INDEPENDENT EARLY FLOWERING 1 isoform X2 [Daucus carota subsp. sativus] [Daucus carota]	-	-	-	-	-	GO:0017111//nucleoside-triphosphatase activity;GO:0032550//purine ribonucleoside binding	-
Isoform0080883	2.21333	2.57667	ELF3	PREDICTED: protein EARLY FLOWERING 3 [Vitis vinifera]	Organismal Systems	Environmental adaptation	ko04712//Circadian rhythm - plant	K12125	-	-	-
Isoform0088917	0.46	0.583333	EFL1	PREDICTED: protein PHOTOPERIOD-INDEPENDENT EARLY FLOWERING 1 isoform X2 [Daucus carota subsp. sativus] [Daucus carota]	-	-	-	-	-	GO:0097159//organic cyclic compound binding;GO:1901363//heterocyclic compound binding	GO:0006996//organelle organization;GO:0044763//single-organism cellular process;GO:0048449//floral organ formation;GO:0050789//regulation of biological process
Isoform0094321	0.226667	0.42	EFL1	PREDICTED: protein PHOTOPERIOD-INDEPENDENT EARLY FLOWERING 1 isoform X2 [Daucus carota subsp. sativus] [Daucus carota]	-	-	-	-	-	-	-
Isoform0098860	0.533333	0.446667	EFL1	PREDICTED: protein PHOTOPERIOD-INDEPENDENT EARLY FLOWERING 1 isoform X2 [Daucus carota subsp. sativus] [Daucus carota]	-	-	-	-	-	GO:0005488//binding	-
Isoform0103146	0.11	0.256667	EFL1	PREDICTED: protein PHOTOPERIOD-INDEPENDENT EARLY FLOWERING 1 isoform X2 [Daucus carota subsp. sativus] [Daucus carota]	-	-	-	-	-	GO:0017111//nucleoside-triphosphatase activity;GO:0032550//purine ribonucleoside binding	-
Isoform0107261	0.446667	1.00333	EFL1	PREDICTED: protein PHOTOPERIOD-INDEPENDENT EARLY FLOWERING 1 isoform X2 [Daucus carota subsp. sativus] [Daucus carota]	-	-	-	-	-	GO:0005488//binding	-
Isoform0113919	0.873333	0.673333	EFL1	PREDICTED: protein PHOTOPERIOD-INDEPENDENT EARLY FLOWERING 1 isoform X1 [Ziziphus jujuba]	-	-	-	-	-	-	-
Isoform0123640	3.01	3.83333	ELF3	PREDICTED: protein EARLY FLOWERING 3 [Vitis vinifera]	Organismal Systems	Environmental adaptation	ko04712//Circadian rhythm - plant	K12125	-	-	-
Isoform0129278	0.58	0.886667	EFL1	PREDICTED: protein PHOTOPERIOD-INDEPENDENT EARLY FLOWERING 1 isoform X1 [Daucus carota subsp. sativus] [Daucus carota]	-	-	-	-	-	-	-
Isoform0129458	0.96	0.97	EFL1	PREDICTED: protein PHOTOPERIOD-INDEPENDENT EARLY FLOWERING 1 isoform X2 [Daucus carota subsp. sativus] [Daucus carota]	-	-	-	-	-	GO:0005488//binding	-
Isoform0129739	0.643333	0.6	EFL1	PREDICTED: protein PHOTOPERIOD-INDEPENDENT EARLY FLOWERING 1 isoform X1 [Daucus carota subsp. sativus] [Daucus carota]	-	-	-	-	-	GO:0097159//organic cyclic compound binding;GO:1901363//heterocyclic compound binding	GO:0006996//organelle organization;GO:0044763//single-organism cellular process;GO:0048449//floral organ formation;GO:0050789//regulation of biological process
Isoform0028282	7.64	5.05333	TOC1	timing of cab expression 1-like [Chrysanthemum seticuspe f. boreale]	Organismal Systems	Environmental adaptation	ko04712//Circadian rhythm - plant	K12127	-	-	GO:0010467//gene expression;GO:0044237//cellular metabolic process;GO:0044707//single-multicellular organism process;GO:0050794//regulation of cellular process;GO:0050896//response to stimulus
Isoform0030494	4.23	3.44	TOC1	timing of cab expression 1-like [Chrysanthemum seticuspe f. boreale]	Organismal Systems	Environmental adaptation	ko04712//Circadian rhythm - plant	K12127	-	-	GO:0010467//gene expression;GO:0044237//cellular metabolic process;GO:0044707//single-multicellular organism process;GO:0050794//regulation of cellular process;GO:0050896//response to stimulus
Isoform0032220	1.07667	0.566667	TOC1	timing of cab expression 1-like [Chrysanthemum seticuspe f. boreale]	Organismal Systems	Environmental adaptation	ko04712//Circadian rhythm - plant	K12127	-	-	-
Isoform0039396	7.12	4.02667	TOC1	timing of cab expression 1-like [Chrysanthemum seticuspe f. boreale]	Organismal Systems	Environmental adaptation	ko04712//Circadian rhythm - plant	K12127	-	-	GO:0010467//gene expression;GO:0044237//cellular metabolic process;GO:0044707//single-multicellular organism process;GO:0050794//regulation of cellular process;GO:0050896//response to stimulus
Isoform0041084	0.616667	0.39	TOC1	timing of cab expression 1-like [Chrysanthemum seticuspe f. boreale]	Organismal Systems	Environmental adaptation	ko04712//Circadian rhythm - plant	K12127	-	-	-
Isoform0042000	4.57333	3.4	TOC1	timing of cab expression 1-like [Chrysanthemum seticuspe f. boreale]	Organismal Systems	Environmental adaptation	ko04712//Circadian rhythm - plant	K12127	-	-	GO:0010467//gene expression;GO:0044237//cellular metabolic process;GO:0044707//single-multicellular organism process;GO:0050794//regulation of cellular process;GO:0050896//response to stimulus
Isoform0055277	0.696667	0.493333	TOC1	timing of cab expression 1-like [Chrysanthemum seticuspe f. boreale]	Organismal Systems	Environmental adaptation	ko04712//Circadian rhythm - plant	K12127	-	-	GO:0010467//gene expression;GO:0044237//cellular metabolic process;GO:0044707//single-multicellular organism process;GO:0050794//regulation of cellular process;GO:0050896//response to stimulus
Isoform0059381	2.29333	1.67667	TOC1	timing of cab expression 1-like [Chrysanthemum seticuspe f. boreale]	Organismal Systems	Environmental adaptation	ko04712//Circadian rhythm - plant	K12127	-	-	GO:0010467//gene expression;GO:0044237//cellular metabolic process;GO:0044707//single-multicellular organism process;GO:0050794//regulation of cellular process;GO:0050896//response to stimulus
Isoform0060606	3.01333	2.49	TOC1	timing of cab expression 1-like [Chrysanthemum seticuspe f. boreale]	Organismal Systems	Environmental adaptation	ko04712//Circadian rhythm - plant	K12127	-	-	GO:0010467//gene expression;GO:0044237//cellular metabolic process;GO:0044707//single-multicellular organism process;GO:0050794//regulation of cellular process;GO:0050896//response to stimulus
Isoform0066718	3.98	2.89333	TOC1	timing of cab expression 1-like [Chrysanthemum seticuspe f. boreale]	Organismal Systems	Environmental adaptation	ko04712//Circadian rhythm - plant	K12127	-	-	-
Isoform0067061	5.22333	4.33667	TOC1	timing of cab expression 1-like [Chrysanthemum seticuspe f. boreale]	Organismal Systems	Environmental adaptation	ko04712//Circadian rhythm - plant	K12127	-	-	GO:0010467//gene expression;GO:0044237//cellular metabolic process;GO:0044707//single-multicellular organism process;GO:0050794//regulation of cellular process;GO:0050896//response to stimulus
Isoform0070486	3.23667	1.84667	TOC1	timing of cab expression 1-like [Chrysanthemum seticuspe f. boreale]	Organismal Systems	Environmental adaptation	ko04712//Circadian rhythm - plant	K12127	-	-	GO:0010467//gene expression;GO:0044237//cellular metabolic process;GO:0044707//single-multicellular organism process;GO:0050794//regulation of cellular process;GO:0050896//response to stimulus
Isoform0073244	1.65667	1.10667	TOC1	timing of cab expression 1-like [Chrysanthemum seticuspe f. boreale]	Organismal Systems	Environmental adaptation	ko04712//Circadian rhythm - plant	K12127	-	-	GO:0010467//gene expression;GO:0044237//cellular metabolic process;GO:0044707//single-multicellular organism process;GO:0050794//regulation of cellular process;GO:0050896//response to stimulus
Isoform0079198	0.65	0.423333	TOC1	timing of cab expression 1-like [Chrysanthemum seticuspe f. boreale]	Organismal Systems	Environmental adaptation	ko04712//Circadian rhythm - plant	K12127	-	-	GO:0010467//gene expression;GO:0044237//cellular metabolic process;GO:0044707//single-multicellular organism process;GO:0050794//regulation of cellular process;GO:0050896//response to stimulus
Isoform0124326	2.05667	1.59	TOC1	timing of cab expression 1-like [Chrysanthemum seticuspe f. boreale]	Organismal Systems	Environmental adaptation	ko04712//Circadian rhythm - plant	K12127	-	-	GO:0008152//metabolic process;GO:0009987//cellular process;GO:0044699//single-organism process;GO:0050789//regulation of biological process;GO:0050896//response to stimulus
Isoform0125274	2.31667	1.08333	TOC1	timing of cab expression 1-like [Chrysanthemum seticuspe f. boreale]	Organismal Systems	Environmental adaptation	ko04712//Circadian rhythm - plant	K12127	-	-	GO:0008152//metabolic process;GO:0009987//cellular process;GO:0044699//single-organism process;GO:0050789//regulation of biological process;GO:0050896//response to stimulus
Isoform0016146	1.42333	0.783333	GI	gigantea-like protein [Chrysanthemum x morifolium]	Organismal Systems	Environmental adaptation	ko04712//Circadian rhythm - plant	K12124	GO:0031981//nuclear lumen	-	GO:0000302//response to reactive oxygen species;GO:0006073//cellular glucan metabolic process;GO:0007602//phototransduction;GO:0009266//response to temperature stimulus;GO:0009639//response to red or far red light;GO:0010468//regulation of gene expression;GO:0048511//rhythmic process;GO:0048571//long-day photoperiodism;GO:0048573//photoperiodism, flowering;GO:0048582//positive regulation of post-…
Isoform0017354	1.21667	0.55	GI	GIGANTEA, partial [Chrysanthemum x morifolium]	Organismal Systems	Environmental adaptation	ko04712//Circadian rhythm - plant	K12124	-	-	GO:0009639//response to red or far red light;GO:0044763//single-organism cellular process;GO:0048511//rhythmic process;GO:0048573//photoperiodism, flowering;GO:0050794//regulation of cellular process
Isoform0022278	0.846667	0.596667	GI	GIGANTEA, partial [Chrysanthemum x morifolium]	Organismal Systems	Environmental adaptation	ko04712//Circadian rhythm - plant	K12124	-	-	-
Isoform0035520	0.62	0.18	GI	GIGANTEA-like protein, partial [Chrysanthemum boreale]	Organismal Systems	Environmental adaptation	ko04712//Circadian rhythm - plant	K12124	-	-	-
Isoform0037830	1.04667	0.393333	GI	GIGANTEA, partial [Chrysanthemum x morifolium]	Organismal Systems	Environmental adaptation	ko04712//Circadian rhythm - plant	K12124	-	-	-
Isoform0051215	1.27667	0.636667	GI	GIGANTEA-like protein [Cynara cardunculus var. scolymus] [Cynara cardunculus]	Organismal Systems	Environmental adaptation	ko04712//Circadian rhythm - plant	K12124	-	-	-
Isoform0055113	0.433333	0.16	GI	GIGANTEA-like protein, partial [Chrysanthemum boreale]	Organismal Systems	Environmental adaptation	ko04712//Circadian rhythm - plant	K12124	-	-	-
Isoform0061196	2.00667	0.783333	GI	GIGANTEA, partial [Chrysanthemum x morifolium]	Organismal Systems	Environmental adaptation	ko04712//Circadian rhythm - plant	K12124	-	-	-
Isoform0062005	0.436667	0.06	GI	GIGANTEA-like protein [Cynara cardunculus var. scolymus] [Cynara cardunculus]	Organismal Systems	Environmental adaptation	ko04712//Circadian rhythm - plant	K12124	-	-	-
Isoform0062200	1.86333	1.58667	GI	GIGANTEA, partial [Chrysanthemum x morifolium]	Organismal Systems	Environmental adaptation	ko04712//Circadian rhythm - plant	K12124	-	-	-
Isoform0063636	7.61667	6.22667	GI	GIGANTEA, partial [Chrysanthemum x morifolium]	Organismal Systems	Environmental adaptation	ko04712//Circadian rhythm - plant	K12124	-	-	-
Isoform0069729	0.89	0.566667	GI	GIGANTEA, partial [Chrysanthemum x morifolium]	Organismal Systems	Environmental adaptation	ko04712//Circadian rhythm - plant	K12124	-	-	-
Isoform0072902	3.83667	2.4	GI	gigantea-like protein [Chrysanthemum x morifolium]	Organismal Systems	Environmental adaptation	ko04712//Circadian rhythm - plant	K12124	GO:0031981//nuclear lumen	-	GO:0000302//response to reactive oxygen species;GO:0006073//cellular glucan metabolic process;GO:0007602//phototransduction;GO:0009266//response to temperature stimulus;GO:0009639//response to red or far red light;GO:0010468//regulation of gene expression;GO:0048511//rhythmic process;GO:0048571//long-day photoperiodism;GO:0048573//photoperiodism, flowering;GO:0048582//positive regulation of post-…
Isoform0074460	0.77	0.44	GI	GIGANTEA-like protein, partial [Chrysanthemum boreale]	Organismal Systems	Environmental adaptation	ko04712//Circadian rhythm - plant	K12124	-	-	-
Isoform0074870	0.836667	0.573333	GI	GIGANTEA-like protein, partial [Chrysanthemum boreale]	Organismal Systems	Environmental adaptation	ko04712//Circadian rhythm - plant	K12124	-	-	-
Isoform0076896	1.4	1.08333	GI	GIGANTEA, partial [Chrysanthemum x morifolium]	Organismal Systems	Environmental adaptation	ko04712//Circadian rhythm - plant	K12124	-	-	-
Isoform0076900	0.456667	0.0933333	GI	GIGANTEA, partial [Chrysanthemum x morifolium]	Organismal Systems	Environmental adaptation	ko04712//Circadian rhythm - plant	K12124	-	-	-
Isoform0079570	3.51	2.29	GI	gigantea-like protein [Chrysanthemum x morifolium]	Organismal Systems	Environmental adaptation	ko04712//Circadian rhythm - plant	K12124	-	-	-
Isoform0081717	1.23333	0.52	GI	GIGANTEA-like protein, partial [Chrysanthemum boreale]	Organismal Systems	Environmental adaptation	ko04712//Circadian rhythm - plant	K12124	-	-	-
Isoform0082023	0.756667	0.463333	GI	GIGANTEA-like protein, partial [Chrysanthemum boreale]	Organismal Systems	Environmental adaptation	ko04712//Circadian rhythm - plant	K12124	-	-	-
Isoform0086315	4.11	2.76667	GI	gigantea-like protein [Chrysanthemum x morifolium]	Organismal Systems	Environmental adaptation	ko04712//Circadian rhythm - plant	K12124	GO:0031981//nuclear lumen	-	GO:0000302//response to reactive oxygen species;GO:0006073//cellular glucan metabolic process;GO:0007602//phototransduction;GO:0009266//response to temperature stimulus;GO:0009639//response to red or far red light;GO:0010468//regulation of gene expression;GO:0048511//rhythmic process;GO:0048571//long-day photoperiodism;GO:0048573//photoperiodism, flowering;GO:0048582//positive regulation of post-…
Isoform0086643	0.206667	0.09	GI	GIGANTEA-like protein, partial [Chrysanthemum boreale]	Organismal Systems	Environmental adaptation	ko04712//Circadian rhythm - plant	K12124	-	-	-
Isoform0091073	0.62	0.28	GI	GIGANTEA-like protein, partial [Chrysanthemum boreale]	Organismal Systems	Environmental adaptation	ko04712//Circadian rhythm - plant	K12124	-	-	-
Isoform0091283	11.41	6.68333	GI	gigantea-like [Chrysanthemum seticuspe f. boreale]	Organismal Systems	Environmental adaptation	ko04712//Circadian rhythm - plant	K12124	GO:0031981//nuclear lumen	-	GO:0000302//response to reactive oxygen species;GO:0006073//cellular glucan metabolic process;GO:0007602//phototransduction;GO:0009266//response to temperature stimulus;GO:0009639//response to red or far red light;GO:0010468//regulation of gene expression;GO:0048511//rhythmic process;GO:0048571//long-day photoperiodism;GO:0048573//photoperiodism, flowering;GO:0048582//positive regulation of post-…
Isoform0092848	1.61333	0.283333	GI	GIGANTEA, partial [Chrysanthemum x morifolium]	Organismal Systems	Environmental adaptation	ko04712//Circadian rhythm - plant	K12124	-	-	-
Isoform0093695	1.49	0.59	GI	GIGANTEA-like protein, partial [Chrysanthemum boreale]	Organismal Systems	Environmental adaptation	ko04712//Circadian rhythm - plant	K12124	-	-	-
Isoform0095553	1.2	0.286667	GI	GIGANTEA, partial [Chrysanthemum x morifolium]	Organismal Systems	Environmental adaptation	ko04712//Circadian rhythm - plant	K12124	-	-	-
Isoform0095834	1.36333	0.623333	GI	GIGANTEA-like protein, partial [Chrysanthemum boreale]	Organismal Systems	Environmental adaptation	ko04712//Circadian rhythm - plant	K12124	-	-	-
Isoform0095908	1.33	0.106667	GI	GIGANTEA, partial [Chrysanthemum x morifolium]	Organismal Systems	Environmental adaptation	ko04712//Circadian rhythm - plant	K12124	-	-	-
Isoform0096670	1.49333	0.836667	GI	GIGANTEA-like protein, partial [Chrysanthemum boreale]	Organismal Systems	Environmental adaptation	ko04712//Circadian rhythm - plant	K12124	GO:0031981//nuclear lumen	-	GO:0000302//response to reactive oxygen species;GO:0006073//cellular glucan metabolic process;GO:0007602//phototransduction;GO:0009266//response to temperature stimulus;GO:0009639//response to red or far red light;GO:0010468//regulation of gene expression;GO:0048511//rhythmic process;GO:0048571//long-day photoperiodism;GO:0048573//photoperiodism, flowering;GO:0048582//positive regulation of post-…
Isoform0097774	1.13667	0.196667	GI	GIGANTEA, partial [Chrysanthemum x morifolium]	Organismal Systems	Environmental adaptation	ko04712//Circadian rhythm - plant	K12124	-	-	-
Isoform0098226	0.943333	0.54	GI	GIGANTEA, partial [Chrysanthemum x morifolium]	Organismal Systems	Environmental adaptation	ko04712//Circadian rhythm - plant	K12124	GO:0031981//nuclear lumen	-	GO:0000302//response to reactive oxygen species;GO:0006073//cellular glucan metabolic process;GO:0007602//phototransduction;GO:0009266//response to temperature stimulus;GO:0009639//response to red or far red light;GO:0010468//regulation of gene expression;GO:0048511//rhythmic process;GO:0048571//long-day photoperiodism;GO:0048573//photoperiodism, flowering;GO:0048582//positive regulation of post-…
Isoform0099968	14.6133	11.5267	GI	gigantea-like protein [Chrysanthemum x morifolium]	Organismal Systems	Environmental adaptation	ko04712//Circadian rhythm - plant	K12124	-	-	-
Isoform0100056	1.31667	0.733333	GI	GIGANTEA-like protein, partial [Chrysanthemum boreale]	Organismal Systems	Environmental adaptation	ko04712//Circadian rhythm - plant	K12124	GO:0031981//nuclear lumen	-	GO:0000302//response to reactive oxygen species;GO:0006073//cellular glucan metabolic process;GO:0007602//phototransduction;GO:0009266//response to temperature stimulus;GO:0009639//response to red or far red light;GO:0010468//regulation of gene expression;GO:0048511//rhythmic process;GO:0048571//long-day photoperiodism;GO:0048573//photoperiodism, flowering;GO:0048582//positive regulation of post-…
Isoform0100075	1.33667	0.693333	GI	GIGANTEA-like protein, partial [Chrysanthemum boreale]	Organismal Systems	Environmental adaptation	ko04712//Circadian rhythm - plant	K12124	-	-	-
Isoform0100254	1.29667	0.956667	GI	GIGANTEA, partial [Chrysanthemum x morifolium]	Organismal Systems	Environmental adaptation	ko04712//Circadian rhythm - plant	K12124	-	-	-
Isoform0100280	1.10333	0.78	GI	GIGANTEA, partial [Chrysanthemum x morifolium]	Organismal Systems	Environmental adaptation	ko04712//Circadian rhythm - plant	K12124	GO:0031981//nuclear lumen	-	GO:0000302//response to reactive oxygen species;GO:0006073//cellular glucan metabolic process;GO:0007602//phototransduction;GO:0009266//response to temperature stimulus;GO:0009639//response to red or far red light;GO:0010468//regulation of gene expression;GO:0048511//rhythmic process;GO:0048571//long-day photoperiodism;GO:0048573//photoperiodism, flowering;GO:0048582//positive regulation of post-…
Isoform0101315	0.93	0.516667	GI	GIGANTEA, partial [Chrysanthemum x morifolium]	Organismal Systems	Environmental adaptation	ko04712//Circadian rhythm - plant	K12124	-	-	-
Isoform0101328	1.23333	0.213333	GI	GIGANTEA, partial [Chrysanthemum x morifolium]	Organismal Systems	Environmental adaptation	ko04712//Circadian rhythm - plant	K12124	-	-	-
Isoform0103470	1.22	0.19	GI	GIGANTEA, partial [Chrysanthemum x morifolium]	Organismal Systems	Environmental adaptation	ko04712//Circadian rhythm - plant	K12124	-	-	-
Isoform0103524	0.716667	0.363333	GI	GIGANTEA, partial [Chrysanthemum x morifolium]	Organismal Systems	Environmental adaptation	ko04712//Circadian rhythm - plant	K12124	-	-	-
Isoform0103545	0.756667	0.616667	GI	GIGANTEA, partial [Chrysanthemum x morifolium]	Organismal Systems	Environmental adaptation	ko04712//Circadian rhythm - plant	K12124	GO:0031981//nuclear lumen	-	GO:0000302//response to reactive oxygen species;GO:0006073//cellular glucan metabolic process;GO:0007602//phototransduction;GO:0009266//response to temperature stimulus;GO:0009639//response to red or far red light;GO:0010468//regulation of gene expression;GO:0048511//rhythmic process;GO:0048571//long-day photoperiodism;GO:0048573//photoperiodism, flowering;GO:0048582//positive regulation of post-…
Isoform0103869	0.8	0.44	GI	GIGANTEA, partial [Chrysanthemum x morifolium]	Organismal Systems	Environmental adaptation	ko04712//Circadian rhythm - plant	K12124	GO:0031981//nuclear lumen	-	GO:0000302//response to reactive oxygen species;GO:0006073//cellular glucan metabolic process;GO:0007602//phototransduction;GO:0009266//response to temperature stimulus;GO:0009639//response to red or far red light;GO:0010468//regulation of gene expression;GO:0048511//rhythmic process;GO:0048571//long-day photoperiodism;GO:0048573//photoperiodism, flowering;GO:0048582//positive regulation of post-…
Isoform0103893	0.03	0.001	GI	GIGANTEA-like protein, partial [Chrysanthemum boreale]	Organismal Systems	Environmental adaptation	ko04712//Circadian rhythm - plant	K12124	-	-	-
Isoform0106003	1.4	0.603333	GI	GIGANTEA, partial [Chrysanthemum x morifolium]	Organismal Systems	Environmental adaptation	ko04712//Circadian rhythm - plant	K12124	-	-	-
Isoform0106132	1.45	0.946667	GI	GIGANTEA-like protein, partial [Chrysanthemum boreale]	Organismal Systems	Environmental adaptation	ko04712//Circadian rhythm - plant	K12124	-	-	-
Isoform0106158	1.16667	0.766667	GI	GIGANTEA-like protein, partial [Chrysanthemum boreale]	Organismal Systems	Environmental adaptation	ko04712//Circadian rhythm - plant	K12124	-	-	-
Isoform0106308	1.47333	0.876667	GI	GIGANTEA, partial [Chrysanthemum x morifolium]	Organismal Systems	Environmental adaptation	ko04712//Circadian rhythm - plant	K12124	-	-	-
Isoform0106381	1.17667	0.576667	GI	PREDICTED: protein GIGANTEA-like isoform X7 [Nicotiana tomentosiformis]	Organismal Systems	Environmental adaptation	ko04712//Circadian rhythm - plant	K12124	-	-	-
Isoform0108273	1.51	0.65	GI	GIGANTEA-like protein, partial [Chrysanthemum boreale]	Organismal Systems	Environmental adaptation	ko04712//Circadian rhythm - plant	K12124	-	-	-
Isoform0110780	0.783333	0.533333	GI	gigantea-like protein [Chrysanthemum x morifolium]	Organismal Systems	Environmental adaptation	ko04712//Circadian rhythm - plant	K12124	-	-	-
Isoform0120285	0.44	0.203333	GI	GIGANTEA-like protein, partial [Chrysanthemum boreale]	Organismal Systems	Environmental adaptation	ko04712//Circadian rhythm - plant	K12124	-	-	-
Isoform0123529	0.623333	0.106667	GI	GIGANTEA-like protein, partial [Chrysanthemum boreale]	Organismal Systems	Environmental adaptation	ko04712//Circadian rhythm - plant	K12124	-	-	-
Isoform0123801	1.13	0.67	GI	GIGANTEA, partial [Chrysanthemum x morifolium]	Organismal Systems	Environmental adaptation	ko04712//Circadian rhythm - plant	K12124	GO:0031981//nuclear lumen	-	GO:0000302//response to reactive oxygen species;GO:0006073//cellular glucan metabolic process;GO:0007602//phototransduction;GO:0009266//response to temperature stimulus;GO:0009639//response to red or far red light;GO:0010468//regulation of gene expression;GO:0048511//rhythmic process;GO:0048571//long-day photoperiodism;GO:0048573//photoperiodism, flowering;GO:0048582//positive regulation of post-…
Isoform0124524	3.81667	1.84333	GI	gigantea-like [Chrysanthemum seticuspe f. boreale]	Organismal Systems	Environmental adaptation	ko04712//Circadian rhythm - plant	K12124	GO:0031981//nuclear lumen	-	GO:0000302//response to reactive oxygen species;GO:0006073//cellular glucan metabolic process;GO:0007602//phototransduction;GO:0009266//response to temperature stimulus;GO:0009639//response to red or far red light;GO:0010468//regulation of gene expression;GO:0048511//rhythmic process;GO:0048571//long-day photoperiodism;GO:0048573//photoperiodism, flowering;GO:0048582//positive regulation of post-…
Isoform0125762	1.27667	0.703333	GI	GIGANTEA, partial [Chrysanthemum x morifolium]	Organismal Systems	Environmental adaptation	ko04712//Circadian rhythm - plant	K12124	GO:0031981//nuclear lumen	-	GO:0000302//response to reactive oxygen species;GO:0006073//cellular glucan metabolic process;GO:0007602//phototransduction;GO:0009266//response to temperature stimulus;GO:0009639//response to red or far red light;GO:0010468//regulation of gene expression;GO:0048511//rhythmic process;GO:0048571//long-day photoperiodism;GO:0048573//photoperiodism, flowering;GO:0048582//positive regulation of post-…
Isoform0126177	1.94333	1.46667	GI	gigantea-like [Chrysanthemum seticuspe f. boreale]	Organismal Systems	Environmental adaptation	ko04712//Circadian rhythm - plant	K12124	GO:0031981//nuclear lumen	-	GO:0000302//response to reactive oxygen species;GO:0006073//cellular glucan metabolic process;GO:0007602//phototransduction;GO:0009266//response to temperature stimulus;GO:0009639//response to red or far red light;GO:0010468//regulation of gene expression;GO:0048511//rhythmic process;GO:0048571//long-day photoperiodism;GO:0048573//photoperiodism, flowering;GO:0048582//positive regulation of post-…
Isoform0126532	2.49667	1.87	GI	GIGANTEA, partial [Chrysanthemum x morifolium]	Organismal Systems	Environmental adaptation	ko04712//Circadian rhythm - plant	K12124	GO:0031981//nuclear lumen	-	GO:0000302//response to reactive oxygen species;GO:0006073//cellular glucan metabolic process;GO:0007602//phototransduction;GO:0009266//response to temperature stimulus;GO:0009639//response to red or far red light;GO:0010468//regulation of gene expression;GO:0048511//rhythmic process;GO:0048571//long-day photoperiodism;GO:0048573//photoperiodism, flowering;GO:0048582//positive regulation of post-…
Isoform0128073	1.62	1.16667	GI	gigantea-like protein [Chrysanthemum x morifolium]	Organismal Systems	Environmental adaptation	ko04712//Circadian rhythm - plant	K12124	GO:0031981//nuclear lumen	-	GO:0000302//response to reactive oxygen species;GO:0006073//cellular glucan metabolic process;GO:0007602//phototransduction;GO:0009266//response to temperature stimulus;GO:0009639//response to red or far red light;GO:0010468//regulation of gene expression;GO:0048511//rhythmic process;GO:0048571//long-day photoperiodism;GO:0048573//photoperiodism, flowering;GO:0048582//positive regulation of post-…
Isoform0031324	2.75	2.97	FLD	PREDICTED: protein FLOWERING LOCUS D isoform X1 [Malus domestica]	-	-	-	-	-	-	-
Isoform0074997	2.86333	4.05	FLD	PREDICTED: protein FLOWERING LOCUS D isoform X1 [Malus domestica]	-	-	-	-	-	-	-
Isoform0007169	1.11333	4.99	CO	CONSTANS-like protein [Chrysanthemum x morifolium]	-	-	-	-	-	-	-
Isoform0007689	20.5033	23.5267	CO	PREDICTED: zinc finger protein CONSTANS-LIKE 5-like [Sesamum indicum]	-	-	-	-	-	-	-
Isoform0012169	9.09667	10.9867	CO	PREDICTED: zinc finger protein CONSTANS-LIKE 5-like [Sesamum indicum]	-	-	-	-	-	-	-
Isoform0012312	4.20667	1.46333	CO	zinc finger protein CONSTANS-LIKE 5 [Dorcoceras hygrometricum]	-	-	-	-	-	-	-
Isoform0013325	3.29333	16.66	CO	CONSTANS-like protein [Chrysanthemum x morifolium]	-	-	-	-	-	-	-
Isoform0015164	15.53	20.1467	CO	PREDICTED: zinc finger protein CONSTANS-LIKE 14-like [Nicotiana sylvestris]	-	-	-	-	-	-	-
Isoform0015424	0.226667	1.62333	CO	CONSTANS-like protein [Chrysanthemum x morifolium]	-	-	-	-	-	-	-
Isoform0015544	7.78667	8.14667	CO	PREDICTED: zinc finger protein CONSTANS-LIKE 13 [Sesamum indicum]	-	-	-	-	-	-	-
Isoform0016558	4.21333	38.1033	CO	zinc finger protein CONSTANS-like protein [Chrysanthemum lavandulifolium]	-	-	-	-	-	-	-
Isoform0017163	1.66667	5.90667	CO	CONSTANS-like protein [Chrysanthemum x morifolium]	-	-	-	-	-	-	-
Isoform0017172	3.07	0.786667	CO	PREDICTED: zinc finger protein CONSTANS-LIKE 5-like [Erythranthe guttata]	-	-	-	-	-	-	-
Isoform0019145	6.09667	7.59667	CO	PREDICTED: zinc finger protein CONSTANS-LIKE 5-like [Sesamum indicum]	-	-	-	-	-	-	-
Isoform0020008	7.66333	6.54333	CO	PREDICTED: zinc finger protein CONSTANS-LIKE 10-like [Ipomoea nil]	-	-	-	-	-	-	-
Isoform0023458	3.06667	34.6567	CO	zinc finger protein CONSTANS-like protein [Chrysanthemum lavandulifolium]	-	-	-	-	-	-	-
Isoform0026478	0.81	3.99667	CO	CONSTANS-like protein [Chrysanthemum x morifolium]	-	-	-	-	-	-	-
Isoform0031420	0.283333	1.22667	CO	constans-like 1 [Chrysanthemum seticuspe f. boreale]	-	-	-	-	-	GO:0046914//transition metal ion binding	-
Isoform0032466	1.09333	4.17	CO	CONSTANS-like protein [Chrysanthemum x morifolium]	-	-	-	-	-	-	-
Isoform0044524	4.51333	1.77667	CO	PREDICTED: zinc finger protein CONSTANS-LIKE 10-like [Daucus carota subsp. sativus] [Daucus carota]	-	-	-	-	-	-	-
Isoform0066888	5.45333	6.12	CO	PREDICTED: zinc finger protein CONSTANS-LIKE 13-like [Nicotiana tabacum]	-	-	-	-	-	-	-
Isoform0073944	0.3	0.04	CO	PREDICTED: zinc finger protein CONSTANS-LIKE 10-like [Ipomoea nil]	-	-	-	-	-	-	-
Isoform0085712	0.98	0.126667	CO	PREDICTED: zinc finger protein CONSTANS-LIKE 10-like [Ipomoea nil]	-	-	-	-	-	-	-
Isoform0094572	0.506667	0.106667	CO	PREDICTED: zinc finger protein CONSTANS-LIKE 10-like [Ipomoea nil]	-	-	-	-	-	-	-
Isoform0102105	0.99	2.72	CO	CONSTANS-like protein [Chrysanthemum x morifolium]	-	-	-	-	-	-	-
Isoform0111324	27.0867	36.9067	CO	PREDICTED: zinc finger protein CONSTANS-LIKE 5-like [Sesamum indicum]	-	-	-	-	-	-	-
Isoform0114933	0.873333	3.92667	CO	CONSTANS-like protein [Chrysanthemum x morifolium]	-	-	-	-	-	-	-
Isoform0115333	22.2767	25.2133	CO	PREDICTED: zinc finger protein CONSTANS-LIKE 5-like [Sesamum indicum]	-	-	-	-	-	-	-
Isoform0116062	2.85667	10.4533	CO	CONSTANS-like protein [Chrysanthemum x morifolium]	-	-	-	-	-	-	-
Isoform0022998	1.41667	0.966667	SVP	PREDICTED: MADS-box protein SVP-like [Sesamum indicum]	-	-	-	-	-	-	GO:0010467//gene expression;GO:0034645//cellular macromolecule biosynthetic process
Isoform0018519	7.55333	11.2633	SVP	PREDICTED: MADS-box protein SVP-like [Ziziphus jujuba]	-	-	-	-	GO:0043231//intracellular membrane-bounded organelle	GO:0001071//nucleic acid binding transcription factor activity;GO:0003677//DNA binding;GO:0046983//protein dimerization activity	GO:0010074//maintenance of meristem identity;GO:0010468//regulation of gene expression;GO:0034645//cellular macromolecule biosynthetic process;GO:0048506//regulation of timing of meristematic phase transition;GO:0090567//reproductive shoot system development
Isoform0023146	9.85	14.97	SVP	PREDICTED: MADS-box protein SVP-like [Ziziphus jujuba]	-	-	-	-	GO:0043231//intracellular membrane-bounded organelle	GO:0001071//nucleic acid binding transcription factor activity;GO:0003677//DNA binding;GO:0046983//protein dimerization activity	GO:0010074//maintenance of meristem identity;GO:0010468//regulation of gene expression;GO:0034645//cellular macromolecule biosynthetic process;GO:0048506//regulation of timing of meristematic phase transition;GO:0090567//reproductive shoot system development
Isoform0026347	27.1	28.6967	SVP	PREDICTED: MADS-box protein SVP-like [Ziziphus jujuba]	-	-	-	-	GO:0043231//intracellular membrane-bounded organelle	GO:0001071//nucleic acid binding transcription factor activity;GO:0003677//DNA binding;GO:0046983//protein dimerization activity	GO:0010074//maintenance of meristem identity;GO:0010468//regulation of gene expression;GO:0034645//cellular macromolecule biosynthetic process;GO:0048506//regulation of timing of meristematic phase transition;GO:0090567//reproductive shoot system development
Isoform0021398	1.50667	1.57333	SVP	short vegetative phase family protein [Chrysanthemum x morifolium]	Environmental Information Processing	Membrane transport	ko02010//ABC transporters	K05658	-	-	-
Isoform0082396	0.283333	0.483333	SVP	short vegetative phase family protein [Chrysanthemum x morifolium]	-	-	-	-	-	-	-
Isoform0002563	0.91	21.1367	SOC1	Transcription factor, K-box [Cynara cardunculus var. scolymus] [Cynara cardunculus]	-	-	-	-	GO:0043231//intracellular membrane-bounded organelle	GO:0001071//nucleic acid binding transcription factor activity;GO:0005515//protein binding	GO:0010468//regulation of gene expression;GO:0034645//cellular macromolecule biosynthetic process
Isoform0055080	0.383333	0.966667	AP1	APETALA1/FRUITFULL [Chrysanthemum x morifolium]	-	-	-	-	-	-	-
Isoform0112842	9.4	37.95	AP1	APETALA1 and FRUITFULL like protein [Chrysanthemum seticuspe f. boreale]	-	-	-	-	-	-	-
Isoform0112230	11.1767	26.6467	AP1	APETALA1 and FRUITFULL like protein [Chrysanthemum seticuspe f. boreale]	-	-	-	-	-	-	-
Isoform0023434	79.11	149.807	AP1	APETALA1 like protein [Chrysanthemum seticuspe f. boreale]	-	-	-	-	GO:0043231//intracellular membrane-bounded organelle	GO:0016628//oxidoreductase activity, acting on the CH-CH group of donors, NAD or NADP as acceptor	GO:0010468//regulation of gene expression;GO:0044710//single-organism metabolic process
Isoform0002779	33.5433	45.4333	AP1	AP1-like protein [Chrysanthemum lavandulifolium]	-	-	-	-	-	-	-
Isoform0037140	6.07333	2.36667	AP2	PREDICTED: transcription factor APETALA2 isoform X1 [Vitis vinifera]	-	-	-	-	-	-	GO:0009987//cellular process
Isoform0115539	1.59	0.843333	AP2	PREDICTED: transcription factor APETALA2 isoform X1 [Vitis vinifera]	-	-	-	-	-	-	GO:0009987//cellular process
Isoform0052403	6.79333	2.85667	AP3	flower development transporter AP3 [Chrysanthemum lavandulifolium]	-	-	-	-	-	-	-
Isoform0047032	12.7967	5.3	AP3	MADS-box transcription factor CDM115 [Chrysanthemum x morifolium]	-	-	-	-	-	-	-
Isoform0112217	19.9533	5.54333	AP3	MADS-box transcription factor CDM19 [Chrysanthemum x morifolium]	-	-	-	-	-	-	-
Isoform0000325	48.0967	12.3433	AP3	MADS-box transcription factor CDM19 [Chrysanthemum x morifolium]	-	-	-	-	-	-	-
Isoform0003288	57.67	28.0967	AP3	MADS-box transcription factor CDM115 [Chrysanthemum x morifolium]	-	-	-	-	-	-	GO:0009653//anatomical structure morphogenesis;GO:0010467//gene expression;GO:0016043//cellular component organization;GO:0030154//cell differentiation;GO:0034645//cellular macromolecule biosynthetic process;GO:0048437//floral organ development;GO:0050789//regulation of biological process
Isoform0102258	2.76667	1	AG	PREDICTED: floral homeotic protein AGAMOUS-like isoform X1 [Sesamum indicum]	-	-	-	-	-	-	GO:0010467//gene expression;GO:0034645//cellular macromolecule biosynthetic process
Isoform0104673	5.9	1.55333	AG	PREDICTED: floral homeotic protein AGAMOUS-like isoform X1 [Sesamum indicum]	-	-	-	-	-	-	-
Isoform0008341	2.55	1.39667	AG	PREDICTED: floral homeotic protein AGAMOUS-like isoform X1 [Sesamum indicum]	-	-	-	-	-	-	GO:0010467//gene expression;GO:0034645//cellular macromolecule biosynthetic process
Isoform0002549	24.28	14.73	PI	flower development transporter PI [Chrysanthemum lavandulifolium]	-	-	-	-	GO:0043231//intracellular membrane-bounded organelle	GO:0001071//nucleic acid binding transcription factor activity;GO:0005515//protein binding	GO:0010468//regulation of gene expression;GO:0034645//cellular macromolecule biosynthetic process
Isoform0111316	31.7533	24.2	PI	flower development transporter PI [Chrysanthemum lavandulifolium]	-	-	-	-	GO:0043231//intracellular membrane-bounded organelle	GO:0001071//nucleic acid binding transcription factor activity;GO:0005515//protein binding	GO:0010468//regulation of gene expression;GO:0034645//cellular macromolecule biosynthetic process;GO:0090567//reproductive shoot system development
Isoform0001572	37.6233	22.2167	PI	flower development transporter PI [Chrysanthemum lavandulifolium]	-	-	-	-	-	-	-
Isoform0003161	44.21	30.5933	PI	MADS-box transcription factor CDM86 [Chrysanthemum x morifolium]	-	-	-	-	GO:0043231//intracellular membrane-bounded organelle	GO:0001071//nucleic acid binding transcription factor activity;GO:0005515//protein binding	GO:0010468//regulation of gene expression;GO:0034645//cellular macromolecule biosynthetic process
Isoform0116576	73.1467	64.5267	PI	flower development transporter PI [Chrysanthemum lavandulifolium]	-	-	-	-	GO:0043231//intracellular membrane-bounded organelle	GO:0001071//nucleic acid binding transcription factor activity;GO:0005515//protein binding	GO:0010468//regulation of gene expression;GO:0034645//cellular macromolecule biosynthetic process
Isoform0026428	74.9033	62.0767	PI	flower development transporter PI [Chrysanthemum lavandulifolium]	-	-	-	-	GO:0043231//intracellular membrane-bounded organelle	GO:0001071//nucleic acid binding transcription factor activity;GO:0005515//protein binding	GO:0010468//regulation of gene expression;GO:0034645//cellular macromolecule biosynthetic process
Isoform0011334	61.02	83.0567	SEP2	MADS domain protein [Gerbera hybrid cultivar]	-	-	-	-	GO:0043231//intracellular membrane-bounded organelle	GO:0001071//nucleic acid binding transcription factor activity;GO:0005515//protein binding	GO:0010468//regulation of gene expression;GO:0034645//cellular macromolecule biosynthetic process
Isoform0001638	62.8367	22.7167	SEP3	MADS-box transcription factor CDM77 [Chrysanthemum x morifolium]	-	-	-	-	-	GO:0005488//binding;GO:0016491//oxidoreductase activity	GO:0010467//gene expression;GO:0034645//cellular macromolecule biosynthetic process;GO:0048437//floral organ development;GO:0050789//regulation of biological process
Isoform0045700	1.67667	3.44333	SEP3	Transcription factor, K-box [Cynara cardunculus var. scolymus] [Cynara cardunculus]	-	-	-	-	-	-	-
Isoform0056776	8.15	10.0967	SEP3	GRCD4 protein [Gerbera hybrid cultivar]	-	-	-	-	GO:0043231//intracellular membrane-bounded organelle	GO:0001071//nucleic acid binding transcription factor activity;GO:0005515//protein binding	GO:0010468//regulation of gene expression;GO:0034645//cellular macromolecule biosynthetic process
Isoform0023384	70.6833	102.697	SEP3	GRCD4 protein [Gerbera hybrid cultivar]	-	-	-	-	GO:0043231//intracellular membrane-bounded organelle	GO:0001071//nucleic acid binding transcription factor activity;GO:0005515//protein binding;GO:0016628//oxidoreductase activity, acting on the CH-CH group of donors, NAD or NADP as acceptor	GO:0010468//regulation of gene expression;GO:0034645//cellular macromolecule biosynthetic process;GO:0044710//single-organism metabolic process
Isoform0050808	1.2	1.88667	SEP	Transcription factor, K-box [Cynara cardunculus var. scolymus] [Cynara cardunculus]	-	-	-	-	-	-	-
