# Supplementary material for: Whole-transcriptome analysis of differentially expressed genes in the mutant and normal capitula of Chrysanthemum morifolium
Source: BMC Genom Data. 2021 Jan 25;22:2. doi: 10.1186/s12863-021-00959-2 (PMC7853313; doi:10.1186/s12863-021-00959-2)
Supplement: Supplementary file 13 — Additional file 13. The genes involved in the GA pathway in chrysanthemum [file 12863_2021_959_MOESM13_ESM.xlsx]

## Sheet: Sheet1
Gene name	GeneID	CK_fpkm	T1_fpkm	Pvalue	FDR	significant	Symbol	Description	KEGG_A_class	KEGG_B_class	Pathway	K_ID	GO Component	GO Function	GO Process
GAICm1	Isoform0021009	2.06333	3.45667	0.00680842	0.00173764	no	GAI	DELLA protein [Chrysanthemum lavandulifolium]	Environmental Information Processing	Signal transduction	ko04075//Plant hormone signal transduction	K14494	-	-	-
GAICm2	Isoform0022294	5.88333	9.96	1.17209e-08	9.01502e-08	no	GAI	DELLA protein [Chrysanthemum lavandulifolium]	Environmental Information Processing	Signal transduction	ko04075//Plant hormone signal transduction	K14494	-	-	-
GAICm3	Isoform0025001	3.79	6.88667	1.00951e-08	7.82969e-08	no	GAI	GRAS protein, partial [Chrysanthemum x morifolium]	Environmental Information Processing	Signal transduction	ko04075//Plant hormone signal transduction	K14494	-	-	-
GAICm4	Isoform0026623	4.82	8.58667	4.64781e-09	3.75837e-08	no	GAI	GRAS protein, partial [Chrysanthemum x morifolium]	Environmental Information Processing	Signal transduction	ko04075//Plant hormone signal transduction	K14494	-	-	-
GAICm5	Isoform0031261	6.03	10.3967	8.79984e-10	7.70649e-09	no	GAI	GRAS protein, partial [Chrysanthemum x morifolium]	Environmental Information Processing	Signal transduction	ko04075//Plant hormone signal transduction	K14494	-	-	-
GAICm6	Isoform0046456	8.81	15.2467	5.69192e-16	8.22602e-15	no	GAI	GRAS protein, partial [Chrysanthemum x morifolium]	Environmental Information Processing	Signal transduction	ko04075//Plant hormone signal transduction	K14494	-	-	-
GAICm7	Isoform0055414	3.61333	5.26333	8.27907e-05	0.000341714	no	GAI	GRAS protein, partial [Chrysanthemum x morifolium]	Environmental Information Processing	Signal transduction	ko04075//Plant hormone signal transduction	K14494	-	-	-
GAICm8	Isoform0067885	6.69667	12.8333	1.13206e-19	1.99725e-18	no	GAI	GRAS protein, partial [Chrysanthemum x morifolium]	Environmental Information Processing	Signal transduction	ko04075//Plant hormone signal transduction	K14494	-	-	-
RGL1Cm	Isoform0050127	16.66	25.9333	0.000191704	0.000731522	no	RGL1	RGA-LIKE 1 protein, partial [Chrysanthemum x morifolium]	Environmental Information Processing	Signal transduction	ko04075//Plant hormone signal transduction	K14494	-	-	-
RGL2Cm	Isoform0047950	17.8033	27.33	0.000194211	0.000740033	no	RGL2	RGA-LIKE 2 protein, partial [Chrysanthemum x morifolium]	Environmental Information Processing	Signal transduction	ko04075//Plant hormone signal transduction	K14494	-	-	-
RGL3Cm	Isoform0026794	21.4567	29.6733	0.0107695	0.0258742	no	RGL3	RGA-LIKE 3 protein, partial [Chrysanthemum x morifolium]	Environmental Information Processing	Signal transduction	ko04075//Plant hormone signal transduction	K14494	-	-	-
GASA10Cm1	Isoform0004343	2.71333	0.92	0.00107127	0.0257558	yes	GASA10	Gibberellin regulated protein [Cynara cardunculus var. scolymus] [Cynara cardunculus]	-	-	-	-	-	-	-
GASA10Cm2	Isoform0001911	9.75	2.97	7.24832e-08	5.03632e-07	yes	GASA10	Gibberellin regulated protein [Cynara cardunculus var. scolymus] [Cynara cardunculus]	-	-	-	-	-	-	-
GASA10Cm3	Isoform0006628	10.4033	2.97	0.000608201	0.0020654	yes	GASA10	Gibberellin regulated protein [Cynara cardunculus var. scolymus] [Cynara cardunculus]	-	-	-	-	-	-	-
GASA10Cm4	Isoform0001154	11.8167	6.18667	0.00148126	0.00455348	no	GASA10	Gibberellin regulated protein [Cynara cardunculus var. scolymus] [Cynara cardunculus]	-	-	-	-	-	-	GO:0001101//response to acid chemical
GASA10Cm5	Isoform0000443	13.8833	3.22333	5.68395e-08	4.00215e-07	yes	GASA10	Gibberellin regulated protein [Cynara cardunculus var. scolymus] [Cynara cardunculus]	-	-	-	-	-	-	-
GASA10Cm6	Isoform0006553	19.95	5.38	1.25843e-12	1.43279e-11	yes	GASA10	Gibberellin regulated protein [Cynara cardunculus var. scolymus] [Cynara cardunculus]	-	-	-	-	-	-	-
GASA10Cm7	Isoform0005631	28.85	8.67	1.46935e-11	1.52992e-10	yes	GASA10	Gibberellin regulated protein [Cynara cardunculus var. scolymus] [Cynara cardunculus]	-	-	-	-	-	-	-
GASA10Cm8	Isoform0004783	50.6967	31.5867	0.000259035	0.000958922	no	GASA10	Gibberellin regulated protein [Cynara cardunculus var. scolymus] [Cynara cardunculus]	-	-	-	-	-	-	GO:0001101//response to acid chemical
GASA10Cm9	Isoform0000332	63.1567	22.0367	4.05008e-31	1.12146e-29	yes	GASA10	Gibberellin regulated protein [Cynara cardunculus var. scolymus] [Cynara cardunculus]	-	-	-	-	-	-	-
GASA14Cm1	Isoform0011642	1.65667	0.03	1.65852e-20	3.04869e-19	yes	GASA14	PREDICTED: gibberellin-regulated protein 14 [Tarenaya hassleriana]	-	-	-	-	-	-	-
GASA14Cm2	Isoform0037137	2.21	0.07	2.35285e-23	4.89257e-22	yes	GASA14	Gibberellin regulated protein [Cynara cardunculus var. scolymus] [Cynara cardunculus]	-	-	-	-	-	-	-
GASA14Cm3	Isoform0058932	7.41	0.001	6.55925e-86	5.58592e-84	yes	GASA14	PREDICTED: gibberellin-regulated protein 14-like [Camelina sativa]	-	-	-	-	-	-	-
GASA14Cm4	Isoform0058902	8.26333	0.323333	1.96358e-64	1.19989e-62	yes	GASA14	PREDICTED: gibberellin-regulated protein 14-like isoform X2 [Pyrus x bretschneideri]	-	-	-	-	-	-	-
GASA14Cm5	Isoform0121203	8.33667	0.306667	3.52778e-59	1.94654e-57	yes	GASA14	PREDICTED: gibberellin-regulated protein 14-like [Camelina sativa]	-	-	-	-	-	-	-
GID1aCm1	Isoform0007594	19.2233	15.8733	0.00557411	0.0145994	no	GID1A	Alpha/beta hydrolase fold-3 [Cynara cardunculus var. scolymus] [Cynara cardunculus]	Environmental Information Processing	Signal transduction	ko04075//Plant hormone signal transduction	K14493	-	GO:0003824//catalytic activity	-
GID1aCm2	Isoform0010875	4.79	3.87333	0.00640627	0.00118777	no	GID1A	Alpha/beta hydrolase fold-3 [Cynara cardunculus var. scolymus] [Cynara cardunculus]	Environmental Information Processing	Signal transduction	ko04075//Plant hormone signal transduction	K14493	-	GO:0003824//catalytic activity	-
GID1aCm3	Isoform0018972	34.6067	22.1067	0.00923524	0.00161077	no	GID1A	Alpha/beta hydrolase fold-3 [Cynara cardunculus var. scolymus] [Cynara cardunculus]	Environmental Information Processing	Signal transduction	ko04075//Plant hormone signal transduction	K14493	-	GO:0003824//catalytic activity	-
GID1aCm4	Isoform0019436	15.8767	9.58333	0.00402012	0.00109902	no	GID1A	Alpha/beta hydrolase fold-3 [Cynara cardunculus var. scolymus] [Cynara cardunculus]	Environmental Information Processing	Signal transduction	ko04075//Plant hormone signal transduction	K14493	-	GO:0003824//catalytic activity	-
GID1aCm5	Isoform0060764	8.68333	5.48667	0.00764428	0.00856736	no	GID1A	Alpha/beta hydrolase fold-3 [Cynara cardunculus var. scolymus] [Cynara cardunculus]	Environmental Information Processing	Signal transduction	ko04075//Plant hormone signal transduction	K14493	-	GO:0003824//catalytic activity	-
GID1aCm6	Isoform0061395	8.10667	4.62333	0.00323539	0.00446086	no	GID1A	Alpha/beta hydrolase fold-3 [Cynara cardunculus var. scolymus] [Cynara cardunculus]	Environmental Information Processing	Signal transduction	ko04075//Plant hormone signal transduction	K14493	-	GO:0003824//catalytic activity	-
GID1aCm7	Isoform0007242	69.57	25.0967	4.20018e-112	4.97472e-110	yes	GID1A	GA Insensitive Dwarf1 A [Lactuca sativa]	Environmental Information Processing	Signal transduction	ko04075//Plant hormone signal transduction	K14493	-	-	-
GID1aCm8	Isoform0010010	29.2833	14.8633	8.72942e-41	3.18693e-39	no	GID1A	GA Insensitive Dwarf1 A [Lactuca sativa]	Environmental Information Processing	Signal transduction	ko04075//Plant hormone signal transduction	K14493	-	-	-
GID1bCm1	Isoform0007882	23.71	10.7633	3.70217e-29	9.56684e-28	yes	GID1B	GA Insensitive Dwarf1 B [Lactuca sativa]	Environmental Information Processing	Signal transduction	ko04075//Plant hormone signal transduction	K14493	-	GO:0003824//catalytic activity	-
GID1bCm2	Isoform0013910	20.5767	10.6533	7.45189e-21	1.39069e-19	no	GID1B	GA Insensitive Dwarf1 B [Lactuca sativa]	Environmental Information Processing	Signal transduction	ko04075//Plant hormone signal transduction	K14493	-	GO:0003824//catalytic activity	-
GID1bCm3	Isoform0054282	9.98667	4.59667	1.87081e-16	2.78225e-15	yes	GID1B	GA Insensitive Dwarf1 B [Lactuca sativa]	Environmental Information Processing	Signal transduction	ko04075//Plant hormone signal transduction	K14493	-	GO:0003824//catalytic activity	-
GID1bCm4	Isoform0117229	18.6	8.15	1.24413e-30	3.39091e-29	yes	GID1B	GA Insensitive Dwarf1 B [Lactuca sativa]	Environmental Information Processing	Signal transduction	ko04075//Plant hormone signal transduction	K14493	-	GO:0003824//catalytic activity	-
GID1cCm1	Isoform0004515	7.42667	4.22667	0.00113001	0.0269831	no	GID1C	GA Insensitive Dwarf1 C [Lactuca sativa]	Environmental Information Processing	Signal transduction	ko04075//Plant hormone signal transduction	K14493	-	GO:0003824//catalytic activity	-
GID1cCm2	Isoform0025895	15.8367	1.43333	7.22154e-73	5.07951e-71	yes	GID1C	GA Insensitive Dwarf1 C [Lactuca sativa]	-	-	-	-	-	-	-
SN2Cm1	Isoform0026312	4.68333	1.13333	7.11888e-09	5.62801e-08	yes	SN2	PREDICTED: gibberellin-regulated protein 1-like isoform X1 [Raphanus sativus]	-	-	-	-	-	-	-
SN2Cm2	Isoform0016949	7.53667	1.25333	1.9457e-24	4.23362e-23	yes	SN2	Gibberellin regulated protein [Cynara cardunculus var. scolymus] [Cynara cardunculus]	-	-	-	-	-	-	-
SN2Cm3	Isoform0024201	7.63	1.67667	2.25215e-27	5.44291e-26	yes	SN2	Gibberellin regulated protein [Cynara cardunculus var. scolymus] [Cynara cardunculus]	-	-	-	-	-	-	-
